# Supplementary material for: The impact of resolving the Rossby radius at mid-latitudes in the ocean: results from a high-resolution version of the Met Office GC2 coupled model
Source: Copernicus journal article supplement (doi:10.5194/gmd-2016-87), 2016-04-19
Supplement: Supplementary file [file gmd-2016-87-AC3-supplement.pdf]

1 **The impact of resolving the Rossby radius at mid-latitudes**  
2 **in the ocean: results from a high-resolution version of the**  
3 **Met Office GC2 coupled model**

4 **Helene T. Hewitt<sup>1</sup>, Malcolm J. Roberts<sup>1</sup>, Pat Hyder<sup>1</sup>, Tim Graham<sup>1</sup>, Jamie Rae<sup>1</sup>,**  
5 **Stephen E. Belcher<sup>1</sup>, Romain Bourdallé-Badie<sup>4</sup>, Dan Copsey<sup>1</sup>, Andrew Coward<sup>2</sup>,**  
6 **Catherine Guiavarch<sup>1</sup>, Chris Harris<sup>1</sup>, Richard Hill<sup>1</sup>, Joël J.-M. Hirschi<sup>2</sup>, Gurvan**  
7 **Madec<sup>2,3</sup>, Matthew S. Mizielinski<sup>1</sup>, Erica Neining<sup>1</sup>, Adrian L. New<sup>2</sup>, Jean-**  
8 **Christophe Rioual<sup>1</sup>, Bablu Sinha<sup>2</sup>, David Storkey<sup>1</sup>, Ann Shelly<sup>1</sup>, Livia Thorpe<sup>1</sup>,**  
9 **and Richard A. Wood<sup>1</sup>**

10 [1]{Met Office, Exeter, United Kingdom}

11 [2]{National Oceanography Centre, Southampton, United Kingdom}

12 [3]{IPSL, Paris, France}

13 [4]{Mercator Océan, Toulouse, France}

14 Correspondence to: H. T. Hewitt (helene.hewitt@metoffice.gov.uk)

15

16 **Abstract**

17 There is mounting evidence that resolving mesoscale eddies and western boundary currents ~~in~~  
18 ~~the surface ocean field as well as topographically-controlled flows~~ can play an important role  
19 in air-sea interaction associated with vertical and lateral transports of heat and salt. Here we  
20 describe the development of the Met Office Global Coupled Model version 2 (GC2) with  
21 increased resolution relative to the standard model: the ocean resolution is increased from  
22  $1/4^\circ$  to  $1/12^\circ$  (28km to 9km at the Equator), the atmosphere resolution increased from 60km  
23 (N216) to 25km (N512) and the coupling ~~period frequency increases~~ reduced from 3-hourly to  
24 hourly. The technical developments that were required to build a version of the model at  
25 higher resolution are described as well as results from a 20 year simulation. The results  
26 demonstrate the key role played by the enhanced resolution of the ocean model: reduced Sea  
27 Surface Temperature biases, improved ocean heat transports, deeper and stronger overturning  
28 circulation and a stronger Antarctic Circumpolar Current. Our results suggest that the

1 improvements seen here require high resolution in both atmosphere and ocean components as  
2 well as high frequency coupling. These results add to the body of evidence suggesting that  
3 ocean resolution is an important consideration when developing coupled models for weather  
4 and climate applications.

5

## 6 **1 Introduction**

7 On the scale of the Rossby radius, the ocean is rich with mesoscale eddies (Chelton et al.,  
8 2011) and oceanic fronts. There is mounting evidence from satellite observations that  
9 mesoscale features in the Sea Surface Temperature (SST) field can drive comparable  
10 variations in atmospheric winds and surface fluxes (Chelton and Xie, 2010; Frenger et al.,  
11 2015). While at the basin scale, observed correlations between SST and surface winds are  
12 negatively correlated, indicating that the atmosphere is driving the ocean, in frontal regions  
13 with high mesoscale activity, such as those associated with Western boundary currents, SST  
14 and surface winds are positively correlated, implying that the ocean is driving the atmosphere  
15 (Bryan et al., 2010). While the primary response to SST takes place in the atmospheric  
16 boundary layer (Chelton and Xie, 2010), there is also evidence that divergence of surface  
17 winds may give rise to vertical motions which may penetrate high into the troposphere  
18 affecting storm tracks and clouds (e.g., Minobe et al., 2008; Sheldon and Czaja, 2014). Of  
19 particular note is the intense rain band in the North Atlantic that follows the path of the Gulf  
20 Stream/North Atlantic Current.

21 The recent CMIP5 ocean models have a horizontal resolution of between  $1^\circ$  and  $1/4^\circ$ .  
22 However, with a resolution of 28km at the Equator down to 6km in the Canadian archipelago  
23 (due to the tripolar grid), even  $1/4^\circ$  remains insufficient to resolve mesoscale eddies which  
24 have a typical scale of 50km in the deep ocean at mid-latitudes (Hallberg, 2013). Several  
25 climate modelling groups have now built global coupled models with an “eddy resolving”  
26 component (e.g., McClean et al., 2011; Bryan et al., 2010; Delworth et al., 2012; Small et al.,  
27 2014; Griffies et al., 2015). In this paper, we describe results from coupling the  $1/12^\circ$  ocean  
28 model (ORCA12) produced by the Drakkar group (Marzocchi et al., 2015; Deshayes et al.,  
29 2013; Treguier et al., 2012) to a 25 km (N512) resolution version of the Met Office Unified  
30 Model (MetUM) atmosphere. This is the first version of the HadGEM3/GC series (Hewitt et  
31 al., 2011; Williams et al., 2015) to resolve the Rossby radius in the ocean at mid-latitudes  
32 (with a resolution of 9km at the Equator down to 2km in the Canadian archipelago) and the

1 first coupled experiment with the NEMO ORCA12 ocean configuration. [The development of](#)  
2 [a global coupled model with atmosphere and ocean components of this resolution as well as](#)  
3 [hourly coupling is the current state of the art for global climate modelling.](#)

4 Evidence from forced ocean simulations demonstrates that resolution enables a more realistic  
5 representation of both eddy kinetic energy (Hurlburt et al., 2009; Griffies et al., 2015), narrow  
6 boundary currents (e.g., Marzocchi et al., 2015) and representation of complex topography, in  
7 particular the sills which connect ocean basins (e.g., improved overflows in the VIKING  
8 model at 1/20° resolution; Behrens ~~et al.~~, 2013). In this paper we investigate how ocean  
9 resolution drives large-scale changes not only in the ocean but also in the climate system.  
10 Changes in the ocean circulation could be important both for present and future climate; for  
11 example, in an ocean-only model with a simple domain, Zhang and Vallis (2013) have shown  
12 that the changes in mean circulation due to eddy-resolving resolution can affect the net ocean  
13 heat uptake under global warming scenarios.

14 In this paper, the model is described in section 2. Our results (section 3) describe the relative  
15 impact of the three changes to the model; ocean resolution, atmosphere resolution and  
16 coupling frequency. Finally in section 4 we summarise and discuss the results.

## 18 **2 Model description**

19 The development of the high resolution coupled climate model is based on the Met Office  
20 Global Coupled model version 2 (GC2; Williams et al., 2015). GC2 is comprised of the Met  
21 Office Unified Model (MetUM; GA6) atmosphere, the JULES land surface model (Best et al.,  
22 2011; GL6), the NEMO ocean model (Madec, 2014; GO5; Megann et al., 2014) and the Los  
23 Alamos CICE sea-ice model (Hunke et al., 2010; GSI6; Rae et al., 2015). The standard  
24 configuration for GC2 has a 60km resolution atmosphere coupled to 1/4° (28km at the  
25 Equator reducing polewards) ocean (N216-ORCA025) with coupling between the  
26 components (as described in Hewitt et al., 2011) every three hours. GA6 has 85 vertical levels  
27 while GO5 has 75 vertical levels with 1m resolution in the top 10m of the ocean (Megann et  
28 al., 2014). Although vertical resolution is not explored here, we include details of the vertical  
29 levels in appendix A.

1 In addition to GC2, this paper describes three modified versions of GC2 with increased  
2 atmosphere resolution, increased coupling frequency and increased ocean resolution. The  
3 different model experiments are described below and summarised in Table 1.

4 GC2 has been run with a high 25km (N512) atmosphere resolution and the standard  
5 (ORCA025) resolution ocean and we will refer to this as GC2-N512. The scientific  
6 differences between N216 and N512 are minimal, as described in Walters et al. (in prep), and  
7 are principally associated with the time step (modified from 15min to 10min) and the  
8 resolution of the external boundary conditions such as the orography.

9 To facilitate direct scientific comparison with the 1/12° ORCA12 (9km at the Equator  
10 reducing polewards) configuration of NEMO, which was developed using NEMO v3.5 rather  
11 than 3.4 (Marzocchi et al., 2015), a modified configuration of GC2, referred to here for  
12 convenience as GC2.1 was developed. The key scientific and technical changes made to  
13 GC2.1 are:

- 14 • ~~An increase a reduction~~ in the coupling ~~period-frequency~~ from 3-hourly to hourly
- 15 • an upgrade to the non-linear free surface scheme rather than the linear free surface
- 16 • a small reduction in the ocean timestep from 1350s to 1200s (to accommodate hourly  
17 coupling)
- 18 • small changes associated with river outflows; outflows prescribed over 15m rather  
19 than 10m with an enhanced vertical mixing in the outflow region of  $1 \times 10^{-3} \text{ m}^2 \text{ s}^{-1}$  rather  
20 than  $2 \times 10^{-3} \text{ m}^2 \text{ s}^{-1}$
- 21 • an upgrade of the sea ice model from CICE4 to CICE5 (Hunke et al., 2015). This  
22 upgrade was for technical reasons and the science of the sea ice configuration remains  
23 unchanged.

24 The reduction of the coupling period in GC2.1 did not lead to coupled ocean/sea ice  
25 instabilities as described by Hallberg (2014).

26 To assess the impact of ocean resolution, a traceable GC2.1 configuration with ORCA12 was  
27 then built (further technical details and model performance issues are discussed in appendix  
28 B). We chose to increase the atmosphere resolution to N512 in order to maintain a similar  
29 ~~aspect~~-ratio of atmosphere to ocean grids. We will refer to this configuration as GC2.1-  
30 N512O12 (i.e., increased atmosphere and ocean resolution).

31

1 The differences between ORCA025 and ORCA12 in GC2.1 are:

- 2 • a reduction in the time step from 1200s to 240s
- 3 • a reduction in the isoneutral tracer diffusion from  $300 \text{ m}^2\text{s}^{-1}$  to  $125 \text{ m}^2\text{s}^{-1}$
- 4 • a reduction in the bilaplacian viscosity from  $-1.5 \times 10^{11} \text{ m}^2\text{s}^{-1}$  to  $-1.25 \times 10^{10} \text{ m}^2\text{s}^{-1}$

5 We note here that the parameter settings in GC2.1-N512O12 have not been tuned for the  
6 coupled model; the model was run using the majority of parameter settings from the forced  
7 ocean-only ORCA12 runs of Marzocchi et al. (2015). While reducing the isoneutral tracer  
8 diffusivity is consistent with the increase in resolution, we note that results may have some  
9 sensitivity to its magnitude. Experiments to investigate the impact of this parameter in GC2  
10 were not performed but will be pursued in future work with GC3 (the next version of the  
11 coupled model).

12 GC2.1-N512O12 was found to be very sensitive to features that had not proved to be a  
13 problem in previous ocean-only integrations (e.g., Marzocchi et al., 2015). For example, the  
14 model became unstable on the east coast of the UK every 6-12 months of simulation due to  
15 extreme values in the velocity field, likely due to the lack of tidales dissipation in the model  
16 which is are very important in this region. The model was restarted from these failures with a  
17 small random perturbation to the atmosphere temperatureie-theta field in a similar way to  
18 treatment of “grid-point instabilities” previously seen in atmosphere models (e.g., Mizielinski  
19 et al 2014). The underlying problem with this unstable ocean point will be addressed in future  
20 developments of the ORCA12 configuration.

21 The GC2 and GC2.1 experiments were run for 20 years with fixed atmospheric radiative  
22 forcing representative of the present day (with greenhouse gas and aerosol values for the year  
23 2000). All experiments were initialised in the following way:

- 24 • atmosphere: N216 and N512 both from September year 18 of the model state of a  
25 previous N512 GA6 (Walters et al., in prep) forced atmosphere integration with  
26 forcing representative of the year 2000, so that the land surface properties are at quasi-  
27 equilibrium;
- 28 • ocean: temperature and salinity from the EN3 observational dataset (Ingleby and  
29 Huddleston, 2007) 2004-8 September average with velocities initialised to zero;
- 30 • sea ice: 20 year September mean from a HadGEM1 (Johns et al., 2006) experiment  
31 representative of a period centred on 1978.

- These latter two are the standard method for initialisation of “present day” coupled simulations at the Met Office.

The choice of the most appropriate ratio between ocean and atmosphere resolution remains an open research question worthy of further study. Short (two year) integrations using both higher and lower atmosphere resolutions coupled to ORCA12 were completed, although due to the short length of the integrations, they are not analysed here. In particular, a configuration using an N768 (17km) atmosphere led to a marked increase in the frequency of the type of model instabilities described earlier (from 1-2 per year to 5-6 per year).

### **3 Impact of model resolution on surface properties, heat transport and ocean circulation**

The results shown in this section derive from 20 year simulations of the four experiments described in table 1, initialised and forced in an identical way.

#### *a. Surface Properties*

The pattern of large-scale biases in SST fields in Hadley Centre coupled climate models have remained largely unchanged since the models first ran without flux correction (e.g., Gordon et al., 2000); the large-scale biases exhibit warming in the Southern Ocean, cooling in the North Pacific and North Atlantic and warming in upwelling/stratocumulus regions off the western coasts of South America and Africa. Many of these biases are also very common in other models (e.g. Small et al., 2014). In contrast to the pattern, the magnitude of the SST biases has changed between model versions; in particular, comparing GC2 and HadGEM2-AO (Figure 1 of Williams et al., 2015), shows that the magnitude of the Northern hemisphere cooling was reduced in GC2 while the magnitude of the Southern Ocean warming was increased.

The time-series of the global mean Top of Atmosphere (TOA) radiation imbalance in the four models (Figure 1a) shows that the experiments with high (N512) atmosphere resolution have TOAs that are generally higher at the start of the experiments. However after 20 years all the experiments are starting to converge to a similar net TOA, as the shortwave and long-wave components adjust. Although the TOA-SST relationship is poorly defined (since the TOA imbalance is related to the rate of change of net ocean heat content; Palmer and McNeill,

1 2014), the integrated effect of the higher net TOA in the N512 experiments can be seen in the  
2 timeseries of the global mean SST (Figure 1b) with GC2-N512 and GC2.1-N512O12 having  
3 higher global mean SSTs.

4 In spite of the differences in global mean SST, major changes to the pattern and magnitude of  
5 SST biases are only seen with both high atmosphere and ocean resolution (Figure 2). In  
6 GC2.1-N512-ORCA12, the large-scale underlying SST biases are reduced relative to GC2  
7 and GC2.1 (Figure 3): the warm bias in the Southern Ocean; cold bias in North Atlantic and  
8 North Pacific and warm biases in stratocumulus regions. Similar reductions in SST biases  
9 with high atmosphere and ocean resolution were also seen in Small et al. (2015). The increase  
10 in ocean resolution is key to this improvement: when only atmosphere resolution is increased  
11 (compare Figures 2a and b), there is only a small reduction in the warm bias associated with  
12 stratocumulus regions (west of South America and Africa), while increased coupling  
13 frequency (compare Figures 2a and c) shows only minor changes in SST biases.

14 In GC2 there is a cold bias in the North Atlantic subpolar gyre (SPG), Greenland-Iceland-  
15 Norwegian (GIN) Seas and the Arctic. GC2.1-N512O12 shows a warming of several degrees  
16 in the SPG and GIN seas relative to GC2 (see reduced cold bias in Figure 2d) and a very large  
17 warming in the Central Arctic. The warming in the Central Arctic is associated with a  
18 warming in the subpolar gyre, enhanced northward heat transport into the Arctic and melting  
19 back of the sea ice edge in the Arctic (see below).

20 Resolution appears to have less of an impact on Sea Surface Salinity (SSS; Figure 4).  
21 Nevertheless, there are reductions in high salinity biases in the Indian Ocean and the Pacific  
22 (in particular, in the salinity maximum in the subtropical gyre of the South Pacific) as well as  
23 reductions in the Arctic biases (although these are very sensitive to the distribution of sea ice).

24

#### 25 *b. Sea ice*

26 The changes to the SST also affect sea ice distribution in both hemispheres. The seasonal  
27 cycle of ice extent in the Arctic (Figure 5a) shows that the warm SSTs in GC2.1-N512O12 at  
28 high Northern latitudes reduce the ice extent throughout the year. The March ice  
29 concentrations in the Arctic (Figure 6) clearly demonstrate that the impact on the sea ice is  
30 concentrated in the GIN seas with the sea ice edge in GC2.1-N512O12 much further north  
31 than seen in GC2 with the edge being north of Spitzbergen and into the Barents Sea.

1 In comparison, the reduction in the warm bias in the Southern hemisphere leads to only  
2 modest increases in the total sea ice extent (Figure 5b); the overall warming bias associated  
3 with the lack of super-cooled liquid clouds (Bodas-Salcedo et al., 2014; Bodas-Salcedo et al.,  
4 in press) still dominates the melting of sea ice. The small increase in sea ice extent is very  
5 inhomogeneous; indeed, some regions in the Southern Ocean such as the Weddell Sea  
6 actually show reductions in sea ice extent in GC2.1-N512-ORCA12 (Figure 6). The  
7 reduction in the Weddell Sea is associated with [the formation of a-polynyas](#) in that region (see  
8 below).

### 10 *c. Sub-surface ocean drifts*

11 Conservation of heat within the climate system implies that the net heat uptake by the ocean  
12 should nearly balance the net radiative imbalance at the TOA. GC2.1-N512O12 has the  
13 highest TOA imbalance of the four models (Table 2) and therefore will have the greatest net  
14 heat uptake. Both models with increased atmosphere resolution (GC2-N512 and GC2.1-  
15 N512O12) have a higher TOA imbalance than the models with lower atmosphere resolution  
16 (GC2 and GC2.1).

17 The global temperature profiles (Figure 7a) show that GC2-N512 and GC2.1-N512O12 do  
18 indeed have greater increases in temperature as a function of depth than either of the low  
19 resolution models (GC2 and GC2.1), which is consistent with the higher TOA imbalance. The  
20 main difference between GC2-N512 and GC2.1-N512O12 is that the increase in heat uptake  
21 extends deeper in GC2.1-N512O12. This difference is also apparent in the global mean SST  
22 anomaly (Table 2); the SST anomaly for years 11-20 in GC2.1-N512O12 is 0.44 K compared  
23 with 0.60 K in GC2-N512, while the TOA imbalance is 2.02 W/m<sup>2</sup> and 1.79 W/m<sup>2</sup>  
24 respectively. This shows that the ORCA12 version of the model is able to transport heat to  
25 depth more effectively.

26 [An increase in heat uptake in GC2.1-N512O12 relative to GC2-N512 is unexpected when](#)  
27 [considering the results of Griffies et al. \(2015\). Griffies et al. \(2015\) show that an increase in](#)  
28 [eddy activity produces upward eddy transport with a net effect of reduced heat uptake. Our](#)  
29 [results do not show a similar result suggesting that either the mean circulation is more](#)  
30 [effectively transporting heat downwards \(which is consistent with an increased overturning](#)  
31 [circulation\) or perhaps that there is an increase in spurious diapycnal mixing. Producing a](#)  
32 [budget analysis in the future would help to address this issue.](#)



1 The distribution of the subsurface temperature changes varies depending on the latitudinal  
2 range. South of 30°S (Figure 7b), near surface warming is reduced in GC2.1-N512O12  
3 relative to the other models. In the Tropics (30°S-30°N; Figure 7c), GC2.1-N512O12 shows  
4 increased warming shallower than 500m relative to the low resolution models but reduced  
5 relative to GC2-N512. The Tropics also show increased warming at depth in GC2.1-  
6 N512O12. The largest increase in near surface temperatures in GC2.1-N512O12 relative to  
7 the other models occurs north of 30°N (Figure 7d) with the surface warming displacing a cold  
8 bias to deeper in the water column. The warming is particularly concentrated north of 65°N  
9 (Figure 7e) where it has previously been shown that Arctic sea ice melts back.

10 Drifts in sub-surface salinity show that GC2.1-N512O12 generally has larger salinity drifts  
11 between 500 and 1000m (Figure 8a) which is largely associated with the region south of 30°S  
12 (Figure 8b). In the northern hemisphere, drifts in salinity between 1000 and 2000m are also  
13 more pronounced in GC2.1-N512O12 than the other models (Figure 8d). In contrast, large  
14 fresh biases north of 65°N in most of the models is much reduced in GC2.1-N512O12 (Figure  
15 8e). Understanding salinity drifts and their relationship to freshwater forcing is complex (eg,  
16 Pardaens et al. 2003) and this aspect of the model performance will require further  
17 investigation.

18

19

20

#### 21 *d. Mixed layer depths*

22 In general over the open oceans, the mixed layer depths<sup>1</sup> (Figure 6) are very similar across the  
23 different models and it is in the deep water formation regions where we see inter-hemispheric  
24 changes. Winter mixed layers in the Northern hemispheres in GC2.1-N512O12 show a  
25 reduction in the North Atlantic subpolar gyre. Most notably, in GC2.1-N512O12 deep mixed  
26 layers are less extensive south of Greenland than in GC2 and are confined to the centre of the  
27 Labrador Sea. Similar changes in Labrador Sea deep convection have been seen in sensitivity  
28 experiments when overflow properties are improved (Graham et al., in prep.). The deeper

---

<sup>1</sup> Mixed layer depth is calculated as the depth at which density changes by  $0.01 \text{ kg m}^{-3}$  relative to the density at 10m

Formatted: Superscript

Formatted: English (United Kingdom)

1 mixed layers in the Arctic in GC2.1-N512O12 are consistent with warmer SSTs and reduced  
2 sea ice extent in that region exposing open water.

3 The similarity of the mixed layer depths across the Southern Ocean demonstrate that it is not  
4 changes to the mixed layer depths that lead to a reduction in the Southern Ocean warm bias.  
5 As mentioned in the previous section, in the Weddell Sea, GC2.1-N512O12 has very deep  
6 mixed layers (maximum of 800m in the decadal mean) linked to the formation of a polynyas.  
7 Polynya formation varies both spatially and on an interannual basis over the last 9 years of the  
8 simulation (Figure 9); the polynya first appears in year 12 and persists for 5 years before  
9 disappearing, starting to re-emerge in year 18 and reaching a depth of 2070m in year 20.  
10 ~~which~~ The appearance of the polynya in this decade explains the lack of increase of sea ice  
11 extent in that region (as seen in Figure 6). Deeper winter mixed layers in GC2.1-N512O12 are  
12 also evident through the mid-latitudes in the formation zones for Sub-Antarctic Mode Waters  
13 and Antarctic Intermediate Waters. These could be due to the reduced warm bias (cooler  
14 SSTs) in these regions (Figure 2).

15

#### 16 *e. Ocean Circulation*

17 The improvements seen in the large-scale SST biases with high atmosphere and ocean  
18 resolution (Figure 3) represent an overall improvement in the model simulation with warming  
19 in the Northern hemisphere and cooling in the Southern hemisphere. This pattern is  
20 reminiscent of inter-hemispheric modes that occur as a result of changes in the large-scale  
21 thermohaline circulation (Vellinga and Wu, 2004). The meridional overturning at 24°N in our  
22 simulations increases by O(1.5 Sv)-changes-only in GC2.1 and in the GC2.1-N512O12, with  
23 an increase of by a further O(1.53 Sv) (Table 2). At 30°S, a change of O(3 Sv) is only seen in  
24 GC2.1-N512O12. both in the North and South Atlantic, and is therefore The enhanced  
25 meridional overturning is therefore attributed to the increased ocean resolution in combination  
26 with the increased coupling frequency. The changes in the meridional overturning circulation  
27 (Figure 910) are dominated by changes in the cell associated with North Atlantic Deep Water  
28 (NADW) with changes extending into the Southern hemisphere. Examination of the  
29 overturning in density space would further support this analysis but this was not possible with  
30 the diagnostics available from this simulation and will be addressed in future simulations.

31 At the northern end of the NADW cell, we see increases in the volume flux of dense  
32 overflows between the GIN Seas and the Atlantic (Table 2) that are consistent with the

1 NADW cell being strengthened both by the GIN sea sources and better representation of sills.  
2 The volume flux of overflow waters across Denmark Straits generally reduces fairly rapidly  
3 in ORCA025 runs (Figure 110a) but in GC2.1-N512O12 the overflow remains closer to the  
4 observed value of 2.9 - 3.7 Sv (Dickson and Brown, 1994; Macrander et al., 2005; [Jochumsen](#)  
5 [et al., 2012](#)). This appears to also contribute to a deeper (as well as stronger) NADW outflow  
6 in ~~GC2-N512O12 this model (Figure 10)~~ and ~~is almost certainly we suggest that this is likely~~  
7 ~~to be~~ associated with the increased resolution of the topography in the region of the  
8 overflows.

9 The Antarctic Circumpolar Current (ACC) usually drifts in the ORCA025 GC models from  
10 an initial value of approximately 150 Sv to below 100 Sv (Figure 110b). Increased ocean  
11 resolution counteracts that, with the ACC stabilising close to 130 Sv in ~~GC2-N512O12 this 20~~  
12 ~~year experiment~~. This value is close to the observations ~~which that~~ suggest an ACC transport  
13 of  $137 \pm 8$  Sv (Cunningham et al., 2003; [Meredith et al., 2011](#)). The increase in the transport  
14 in the ACC can be explained by changes in the density field; the meridional density gradients  
15 across the ACC (not shown) are increased in GC2.1-N512O12 (with steeper isopycnals) than  
16 in GC2. ~~which~~ This result is consistent with increased southward flow, and stronger  
17 upwelling, of NADW to the north of the ACC ([Allison et al., 2011](#)) and increased convection  
18 to the south of the ACC in the Weddell Sea ([Hirabara et al., 2012](#)). The Southern Ocean  
19 winds (not shown) respond differently across the four simulations (including a small increase  
20 in GC2.1-N512O12 and a decrease in GC2.1). ~~Jones et al. (2011) have shown that the~~  
21 ~~transient response of the ACC to changes in winds can be seen within 10 years, suggesting~~  
22 ~~that it is not surprising that we are able to detect changes in the ACC in this set of~~  
23 ~~experiments. and investigating these changes, how they relate to the model internal variability~~  
24 ~~and their impact on the simulation will be a topic of future research.~~

Formatted: Not Highlight

25

#### 26 *f. Heat transport*

27 As described in Gordon et al. (2000), drifts in volume averaged ocean temperature can be  
28 related to discrepancies between the actual heat transports by the ocean and the heat transport  
29 implied by the surface fluxes, i.e.

$$30 \quad \frac{\partial \rho c_p \langle \theta \rangle}{\partial t} + \oint \rho c_p (\bar{v}\bar{\theta} + \overline{v'\theta'}) dS + \oint \rho c_p A_{iso} \nabla_{\rho} \theta dS = \int F dA, \quad (1)$$

1 where  $\langle \theta \rangle$  is the volume integrated temperature,  $\bar{v}\bar{\theta}$  and  $\overline{v'\theta'}$  are the time mean and time  
2 varying components of the ocean meridional heat transports,  $\rho c_p$  is density multiplied by  
3 specific heat capacity,  $A_{iso}$  is the ~~isoneutral diffusivity~~isopycnal diffusion,  $\nabla_{\rho}\theta$  is the  
4 isoneutral gradients of temperature, ~~and~~  $F$  is the surface heat flux,  $dS (=dx*dz)$  is the cross  
5 sectional area (x and z denote the zonal and vertical directions) and  $dA$  is the surface area of  
6 the region. For our purposes here, we make the assumption that the isoneutral fluxes are  
7 generally smaller than the other terms (~~isoneutral~~isopycnal diffusive fluxes are very small when  
8 integrated over full depth).

9 Figure 12a shows the global northward heat transport in all four simulations. There are some  
10 changes in the northern hemisphere in the GC2.1 simulation with the change to hourly  
11 coupling, while changes in the southern hemisphere are only seen in GC2.1-N512O12  
12 suggesting that these changes are driven by the increase in ocean resolution. The reduction in  
13 southward heat transport in GC2.1-N512O12 centred at 45°S is highly unusual; although the  
14 change does not lie outside interannual variability, a change of this magnitude in the multi-  
15 year mean heat transport has not been seen in any other development runs of the GC series.  
16 The modelled changes in the heat transports suggest that ocean processes are important in this  
17 region, which is particularly relevant given the uncertainty in surface heat fluxes in the  
18 Southern Ocean (Cerovecki et al., 2011). The ~~increase~~change in total heat transport comes  
19 primarily from the time mean heat transport (not shown). This suggests that ~~increased changes~~  
20 ~~in~~ resolution has ~~ve led to a change in~~ either ~~changed~~ the mean circulation or the temperature  
21 profile. ~~In contrast, if the (as opposed to a increased heat transport was) change due to in~~  
22 the time varying heat transport, ~~this which~~ would imply a direct role ~~for of the~~ mesoscale eddies).  
23 As seen in previous sections, GC2.1-N512O12 shows changes in both the circulation and the  
24 temperature profiles. The decreased southward heat transport in the Southern Ocean of  
25 GC2.1-N512O12 could – at least partly - explain the reduced warm bias.

26 By comparing actual ocean heat transports with those implied by surface fluxes (i.e., the  
27 second term of the left-hand side of Eqn. 1 with the right-hand side of Eqn. 1), this gives an  
28 indication of the volume averaged drift in temperature (first term on the left-hand side of Eqn.  
29 1). To remove the effect of the net radiative imbalance, the implied ocean heat transport is  
30 calculated by subtracting the globally averaged imbalance from the surface fluxes before  
31 integrating zonally and meridionally. This is equivalent to removing a globally integrated  
32 temperature drift from the left-hand side of Eqn. 1. This can be described as:

$$\frac{\partial \rho c_p \langle \theta \rangle - \bar{\theta}}{\partial t} + \oint \rho c_p (\bar{v}\bar{\theta} + \overline{v'\theta'}) dS = \int (F - \bar{F}) dA, \quad (2)$$

where  $\bar{\theta}$  and  $\bar{F}$  are the global mean temperature and surface flux respectively. Eqn. 2 shows that a residual imbalance between the implied and actual ocean heat transports is indicative of local temperature drifts. Both globally and in the Atlantic basin (Figure 12a,b) GC2.1-N512O12 can be seen to be as close to local balance as any of the other models, suggesting that the net drifts will be of a similar magnitude (in agreement with Figure 5).

Ocean resolution is the driving factor in a 0.2PW increase in the northward heat transport in the Atlantic; the modelled heat transports in GC2.1-N512O12 are generally within the error bars of the observations (Ganachaud and Wunsch, 2003; Figure 12b) in contrast to the other models with the lower resolution ocean component. The change in heat transport is linked to an increase in the overturning circulation (previous section), which is unsurprising given the dominant role of the meridional overturning circulation in the Atlantic heat transport (Hall and Bryden, 1982).

14

#### 15 4 Summary and Discussion

16 In this paper we have shown results from a coupled climate model with an eddy resolving  
 17 (1/12°) ocean component coupled to a high resolution (25 km) atmosphere component. When  
 18 the SST bias from this climate simulation is compared to that from the Met Office standard  
 19 resolution climate model, with eddy permitting (1/4°) ocean component and 60km atmosphere  
 20 component, it is apparent that major SST biases in the Southern Ocean and North Atlantic and  
 21 North Pacific have been reduced. Comparable experiments increasing only the atmosphere  
 22 resolution or the coupling frequency, demonstrate that increased ocean resolution is the key  
 23 driver for this change.

24 At the enhanced ocean resolution, the ocean circulation leads to increased poleward ocean  
 25 heat transport in the Northern hemisphere and reduced poleward ocean heat transport in the  
 26 Southern hemisphere. The change in the northward heat transport is driven at least in part by  
 27 an enhanced NADW cell ~~which also contributes to maintaining the ACC front.~~ The stronger  
 28 ACC front is maintained in spite of the expectation that improved representation of eddies in  
 29 the Southern Ocean could lead to slumping of the front, this is at least in part associated with  
 30 at high resolution may be associated with a number of factors: enhanced windstresses,  
 31 increased at high resolution deep water formation in the Weddell Sea due to the presence of a

1 | polynya, enhanced southward transport of NADW and eddy fluxes. Changes in the global  
2 | heat transports produce a shift in the large-scale biases, cooling the Southern Ocean and  
3 | warming the North Atlantic and North Pacific. We have shown that heat penetrates deeper in  
4 | our 1/12° model; Griffies et al. (2015) have demonstrated that mesoscale eddies transport heat  
5 | upwards so it is likely that the increased transport of heat to depth is achieved by the time-  
6 | mean as seen in transient experiments such as Banks and Gregory (2006). Future work will be  
7 | focused on understanding the relative roles of resolving overflow topography (Behrens,  
8 | 2013), eddy processes within the ocean including compensation and saturation (e.g., Munday  
9 | et al., 2013) and air-sea interaction on the eddy scale (Roberts et al., in prep.) in driving the  
10 | large-scale changes.

11 | Relative to the recent high resolution results of Small et al. (2014) and Griffies et al. (2015),  
12 | our results emphasise the importance of increasing both ~~atmosphere and~~ ocean resolution and  
13 | coupling frequency. Griffies et al. (2015) show smaller reductions in SST biases than seen  
14 | here when moving from 1/4° to 1/10° resolution presumably related to keeping the  
15 | atmosphere resolution unchanged. Enhanced coupling frequency along with enhanced vertical  
16 | resolution near the air-sea interface both in the ocean (Megann et al., 2014) and atmosphere  
17 | (Walters et al., in prep) is one feature of our model setup that is missing in Small et al. (2014).  
18 | These aspects of the model setup may be especially important in regions of strong air-sea  
19 | interaction including the stratocumulus regions where we see large improvements in the  
20 | GC2.1-N512O12 simulation. ~~Overall, the improvements seen in this paper~~ Further work is  
21 | required to quantify whether a combination of high resolution in ~~the both~~ atmosphere  
22 | component is necessary in combination with ~~and the high resolution~~ ocean components ~~and~~  
23 | well as high frequency coupling to produce the results described in this paper.

24 | As described in ~~the previous~~ section 2, one of the changes to the ocean model at higher  
25 | resolution was a reduction in the isoneutral diffusivity~~on~~. Pradal and Gnanadesikan (2014)  
26 | show that a reduction in the isoneutral diffusivity~~on~~ from 800 m<sup>2</sup>s<sup>-1</sup> to 400 m<sup>2</sup>s<sup>-1</sup> in a coarse  
27 | resolution climate model is associated with cooling of order 1°C at high latitudes after 500  
28 | years. ~~Given While that~~ the results here ~~may~~ exhibit some consistency with those of Pradal  
29 | and Gnanadesikan (2014) in the Southern Ocean, further work is required to quantify the role  
30 | of isoneutral diffusivity in producing the change in isopycnal diffusion is believed to be a  
31 | secondary effect due to the fact that we are seeing a comparable or larger changes in SST on  
32 | decadal timescales in a short 20-year run.

1 One caveat of these results is that the parallel simulations lasted only 20 years. However, ~~the~~  
2 ~~close agreement between implied and actual meridional heat transports, suggests that the~~  
3 ~~models are close to quasi-equilibrium. Additionally,~~ the broad similarity of the results  
4 presented here compared with those of Small et al. (2014) from over 100 years of simulation  
5 suggest that the results are reasonably robust. In terms of model drift, climate models  
6 typically have a fast adjustment within the first five years (Sanchez-Gomez et al., 2016).  
7 Large adjustments over the first 20 years are generally followed by a multi-centennial drift  
8 towards equilibrium between ocean properties and the net TOA flux (Banks et al., 2007).  
9 Longer simulations and further analyses will enable the robustness of the results presented  
10 here (including wind-SST feedbacks) to be more fully understood.

11 In the results presented here, the 1/12° ocean model, which has a resolution of approximately  
12 7 km at mid-latitudes, is coupled to an N512 atmosphere model, which has a resolution of 25  
13 km. The relative importance of the atmosphere and ocean resolution remains a question which  
14 will continue to be addressed in the community. We suggest that an~~A~~ atmosphere:ocean  
15 ratio of 4:1 may be too high for the atmosphere to fully ~~respond to~~capture the details of the  
16 ocean mesoscale. Future work will investigate the impact of coupling to even higher  
17 resolution atmosphere models to investigate the role of the atmosphere:ocean ratio.

18 As we move towards ~~seamless coupled prediction,~~ using coupled models for prediction on  
19 timescales from days to centuries, the results presented here are highly relevant to prediction  
20 up to decadal timescales where data assimilation is employed. A coupled model that more  
21 faithfully produces the current state of the ocean will rely less on data assimilation for  
22 correcting large-scale biases and ~~be more able to include the representation of~~ better represent  
23 spatial anomalies that control the large-scale variability. While there are many regions where  
24 subsurface drifts are improved at ORCA12~~this~~ resolution, reducing the drifts seen in mid-  
25 depth salinity will be important.

26 The ocean data assimilation scheme used in Met Office systems is called NEMOVAR,  
27 employed in a 3DVar first-guess-at-appropriate-time (FGAT) mode (Waters et al., 2015). A  
28 new version of NEMOVAR has recently been developed (Weaver et al. 2016) which uses a  
29 2D implicit diffusion operator to model the horizontal background error covariances, one of  
30 the most computationally expensive aspects of the scheme. This new version has been  
31 developed in such a way that the number of costly global communications are minimised and  
32 is therefore expected to scale well with resolution. Preliminary implementations of this

Formatted: Font color: Auto

1 scheme in the ORCA12 configuration indicate that it will be feasible to implement it for  
2 operational ocean forecasting applications.

3 A key question for these timescales is whether employing enhanced resolution will address  
4 the known problem of low signal-to-noise ratios (Eade et al., 2014) that has led to the need for  
5 large ensembles for seasonal to decadal forecasting in lower resolution systems. Future work  
6 to understand the drivers of large-scale bias reduction will support targeted experiments to  
7 address the relative roles of resolution and ensemble size at these timescales. That said, ocean  
8 resolution is clearly not going to solve all the issues in climate models; atmosphere errors  
9 often dominate surface biases and, even at high resolution, ocean models need improved  
10 representation of sub-gridscale processes.

### 13 **Code availability**

14 The MetUM is available for use under licence. A number of research organizations and  
15 national meteorological services use the MetUM in collaboration with the Met Office to  
16 undertake basic atmospheric process research, produce forecasts, develop the MetUM code  
17 and build and evaluate Earth system models. For further information on how to apply for a  
18 licence see <http://www.metoffice.gov.uk/research/collaboration/um-collaboration>. JULES is  
19 available under licence free of charge. For further information on how to gain permission to  
20 use JULES for research purposes see <https://jules.jchmr.org/software-and-documentation>. The  
21 model code for NEMO v3.4 and v3.5 is available from the NEMO website ([www.nemo-](http://www.nemo-ocean.eu)  
22 [ocean.eu](http://www.nemo-ocean.eu)). On registering, individuals can access the code using the open source subversion  
23 software (<http://subversion.apache.org/>). The model code for CICE is freely available  
24 (<http://oceans11.lanl.gov/trac/CICE/wiki/SourceCode>) from the United States Los Alamos  
25 National Laboratory. In order to implement the scientific configuration of GC2/GC2.1 and to  
26 allow the components to work together, a number of branches (code changes) are applied to  
27 the above codes. Please contact the authors for more information on these branches and how  
28 to obtain them.

### 30 **Appendix A: Model vertical levels**

31 The sensitivity to vertical resolution is not explored in this paper. However, a reduced  
32 description of the vertical levels in GA6 (Table A1) and GO5 (Table A2) are included to



1 allow comparison with other models. For the full vertical levels, see Walters et al. (in prep.)  
2 and Megann et al. (2014), respectively.

3

4

| Level | Rho_height (m) |
|-------|----------------|
| 1     | 10.00          |
| 10    | 730.00         |
| 20    | 2796.67        |
| 30    | 6196.67        |
| 40    | 10930.12       |
| 50    | 17012.40       |
| 60    | 24710.70       |
| 70    | 35927.89       |
| 80    | 58978.35       |
| 85    | 82050.01       |

5 Table A1: Reduced list of level in GA6 which has 85 vertical levels

6

**Formatted:** Justified, Space Before: 6 pt, Line spacing: 1.5 lines

1

| Level | Depth (m) | Thickness (m) |
|-------|-----------|---------------|
| 1     | 0.51      | 1.02          |
| 10    | 13.99     | 2.37          |
| 20    | 61.11     | 7.58          |
| 30    | 180.55    | 18.27         |
| 40    | 508.64    | 53.76         |
| 50    | 1387.38   | 125.29        |
| 60    | 2955.57   | 181.33        |
| 65    | 3897.98   | 194.29        |
| 70    | 4888.07   | 200.97        |
| 75    | 5902.06   | 204.23        |

2 Table A2: Reduced list of levels and layer thicknesses in GO5 which has 75 vertical levels

3

## 1 **Appendix B: Model performance and technical aspects**

2 The GC2.1 configuration was the first in which several further technical components of the  
3 coupled system were considered essential to make the simulation manageable. The coupler  
4 was upgraded from OASIS3 to OASIS3-MCT (Valcke et al, 2015) in order to improve  
5 parallelisation of the coupling, particularly given the increased coupling frequency.

6 ORCA025 files are typically written as one file per processor by standard GC2 configurations  
7 and combined into a single file prior to analysis as a post processing step. However, as HPC  
8 parallel file systems are generally tuned for high bandwidth on large files and as GC2.1-  
9 N512O12 configurations allocate 50 of the 80 nodes used by the full coupled system to the  
10 ocean, this led to performance and functional issues when running on 1600 or more cores.  
11 The NEMO XIOS diagnostic server (Madec, 2014) provides an asynchronous IO server  
12 capability that allows the diagnostic files to be output as fewer larger files (although the  
13 restart files are still written as one file per processor). Its introduction in the model allowed us  
14 to overcome the limitations of the file system.

15 Land suppression was used for the NEMO and CICE models, so that processors are only  
16 assigned to regions with active ocean points. This leads to a significant gain in core count,  
17 although it meant that the automated large-scale diagnostics usually produced by NEMO  
18 (zonal mean heat transports, meridional overturning) could not be generated.

19 Data volumes from this experiment were particularly large due to the output of additional  
20 hourly and 3-hourly fluxes in order to examine the coupling processes in more detail. Each  
21 month of model output comprised: ocean monthly mean files (netCDF) of 87GB together  
22 with 6GB of daily files, sea-ice output (netCDF) of 57GB per month (with an additional  
23 48GB of hourly output), and atmosphere output (PP format) of 100 GB per month. In total,  
24 the 20 years of simulation produced 85 TB of data.

25 Little optimisation of the model was attempted since GC2.1 is not intended to be supported in  
26 the long-term. Its successor, GC3, will be used for CMIP6. The GC2.1-N512O12 model used  
27 80 full nodes (each of 32 cores) of an IBM Power 7 HPC, of which 55 were allocated to the  
28 ocean/sea ice component (including 5 for the IO servers) and 25 for the atmosphere/land  
29 component. The model throughput was 4 months per wall-clock day.

30 For previous model resolutions, the SCRIP utility (Jones, 1998) was used to generate the  
31 conservative remapping files used to regrid coupling data between the ocean and atmosphere

1 grids (for temperature and fluxes), with bilinear interpolation used for the winds and surface  
2 currents. However, due to the size of the high resolution grids used here, and the serial nature  
3 of SCRIP, a different method was required. ESMF (ESMF, 2014; a package of parallelised  
4 tools that use the same input grid descriptions as SCRIP, but can be run in parallel) was  
5 therefore used to generate the remapping weights.

6

7

## 8 **Acknowledgements**

9 [We thank the Editor and the two reviewers \(Stephen Griffies and Andy Hogg\) for their](#)  
10 [constructive comments. Matt Martin provided useful input on data assimilation for ORCA12.](#)

11 This work was primarily supported by the Joint DECC/Defra Met Office Hadley Centre  
12 Climate Programme (GA01101). Part of the work was undertaken with National Capability  
13 funding from NERC for ocean modelling. We acknowledge use of the MONSooN system, a  
14 collaborative facility supplied under the Met Office-NERC Joint Weather and Climate  
15 Research Programme (JWCRP). Met Office authors were supported by the joint UK  
16 DECC/DEFRA Met Office Hadley Centre Climate Programme (GA01101). MR  
17 acknowledges support from the EU FP7 IS-ENES2 project for work on ESMF and regriding  
18 tools. We acknowledge the considerable effort on development and evaluation of ORCA12 by  
19 the DRAKKAR community. HH thanks IH.

20

21

## 22 **References**

23 [Allison, L. C., Johnson, H. L. and Marshall, D. P.: Spin-up and adjustment of the Antarctic](#)  
24 [Circumpolar Current and global pycnocline, J. Mar. Res., 69, 167-189, 2011.](#)

25 Banks, H. T. and Gregory, J. M.: Mechanisms of ocean heat uptake in a coupled climate  
26 model and the implications for tracer based predictions of ocean heat uptake, Geophys. Res.  
27 Lett., 33, L076208, doi:10.1029/2005GL025352, 2006.

28 Banks, H. T., Stark, S. and Keen, A. B.: The adjustment of the coupled climate model  
29 HadGEM1 towards equilibrium and the impact on global climate, J. Climate, 20, 5815-5826,  
30 2007.

1 Behrens, E.: The oceanic response to Greenland melting: the effect of increasing model  
2 resolution, PhD thesis, University of Kiel, 2013.

3 Best, M. J., Pryor, M., Clark, D. B., Rooney, G. G., Essery, R. L. H., Ménard, C. B., Edwards,  
4 J. M., Hendry, M. A., Porson, A., Gedney, N., Mercado, L. M., Sitch, S., Blyth, E., Boucher,  
5 O., Cox, P. M., Grimmond, C. S. B., and Harding, R. J.: The Joint UK Land Environment  
6 Simulator (JULES), model description – Part 1: Energy and water fluxes, *Geosci. Model*  
7 *Dev.*, 4, 677–699, doi:10.5194/gmd-4-677-2011, 2011

8 Bodas-Salcedo, A., Williams, K. D., Ringer, M. A., Beau, I., Cole, J. N. S., Dufresne, J.-L.,  
9 Koshiro, T., Stevens, B., Wang, Z. and Yokohata, T.: Origins of the solar radiation biases  
10 over the Southern Ocean in CFMIP2 models, *J. Climate*, 27, 41-56, doi:10.1175/JCLI-D-13-  
11 00169.1., 2014.

12 Bodas-Salcedo, A., Hill, P. G., Furtado, K., Karmalkar, A., Williams, K. D., Field, P. R.,  
13 Manners, J. C., Hyder, P. and Kato, S.: Large contribution of supercooled liquid clouds to the  
14 solar radiation budget of the Southern Ocean, *J. Climate*, in press.

15 Bryan, F. O., Tomas, R., Dennis, J. M., Chelton, D. B., Loeb N. G. and McClean J. L.:  
16 Frontal scale air-sea interaction in high-resolution coupled climate models, *J. Clim.*,  
17 doi:10.1175/2010JCLI3665.1, 2010.

18 Cerovecki, I., Talley, L. D., Mazloff, M. R.: A Comparison of Southern Ocean Air-Sea  
19 Buoyancy Flux from an Ocean State Estimate with Five Other Products. *Journal of Climate*.  
20 24:6283-6306, 2011.

21 Chelton, D. B. and Xie, S.-P.: Coupled ocean-atmosphere interaction at oceanic mesoscales,  
22 *Oceanography*, 23(4), 52-69, 2010.

23 Chelton, D. B., Schlax, M. G. and Samelson, R. M.: Global observations of nonlinear  
24 mesoscale eddies, *Prog. Oceanogr.*, 91, 167-216, 2011.

25 Cunningham, S. A., Alderson, S. G., King, B. A. and Brandon, M. A.: Transport and  
26 variability of the Antarctic Circumpolar Current in Drake Passage, *J. Geophys. Res.*, 108,  
27 doi:10.1029/2001JC001147, 2003.

28 Delworth, T. L., Rosati, A., Anderson, W. G., Adcroft, A., Balaji, V., Benson, R., Dixon, K.  
29 W., Griffies, S. M., Lee, H.-C., Pacanowski, R. C., Vecchi, G. A., Wittenberg, A. T., Zeng,

1 F., and Zhang, R.: Simulated climate and climate change in the GFDL CM2.5 high-resolution  
2 coupled climate model. *Journal of Climate*, 25(8), doi:10.1175/JCLI-D-11-00316.1, 2012.

3 Deshayes, J.,Treguier, A. -M., Barnier, B., Lecointre, A., Le Sommer, J, Molines, J.-M.,  
4 Penduff, T., Bourdalle-Badie, R., Drillet, Y., Garric, G., Benshila, R., Madec, G., Biastoch,  
5 A., Boening, C. W., Scheinert, M., Coward, A. C. and Hirschi, J. J.: Oceanic hindcast  
6 simulations at high resolution suggest that the Atlantic MOC is bistable, *Geophys. Res. Lett.*,  
7 40, 3069-3073 doi:10.1002/grl.50534, 2013.

8 Dickson R.R., Brown J.: The production of North Atlantic Deep Water: Sources, rates, and  
9 pathways. *J Geophys Res* 99(C6):12,319–12,341, DOI 10.1029/94jc00530, 1994.

10 Eade, R., Smith D., Scaife A., Wallace E., Dunstone N., Hermanson L. and Robinson N.: Do  
11 seasonal to decadal predictions underestimate the predictability of the real world?, *GRL*, DOI:  
12 10.1002/2014GL061146, 2014.

13 ESMF: Earth System Modelling Framework Reference Manual for Fortran, 2014. Available  
14 from  
15 [http://www.earthsystemmodeling.org/esmf\\_releases/public/ESMF\\_6\\_3\\_0rp1/ESMF\\_refdoc](http://www.earthsystemmodeling.org/esmf_releases/public/ESMF_6_3_0rp1/ESMF_refdoc)

16 Frenger, I., Gruber, N., Knutti, R. and Munnich, M.: Imprint of Southern Ocean eddies on  
17 winds, clouds and rainfall, *Nature Geoscience*, 6, 608-612, 2013.

18 Ganachaud, A. and Wunsch, C.: Large-scale ocean heat and freshwater transports during  
19 World Ocean Circulation Experiment, *J. Climate*, 16, 696-705, 2003.

20 Gordon C., Cooper, C., Senior, C. A., Banks, H., Gregory, J. M., Johns, T. C., Mitchell, J.  
21 F. B., and Wood, R. A.: The simulation of SST, sea ice extents and ocean heat transports in a  
22 version of the Hadley Centre coupled model without flux adjustments, *Climate Dynamics*, 16,  
23 147-168, 2000.

24 Griffies, S. M., Winton, M., Anderson, W. G., Benson, R., Delworth, T. L., Dufour, C. O.,  
25 Dunne, J. P., Goddard, P., Morrison, A. K., Rosati, A., Wittenberg, A. T., Yin, J. J. and  
26 Zhang, R.: Impacts on Ocean Heat from Transient Mesoscale Eddies in a Hierarchy of  
27 Climate Models, *J. Climate*, 28, 952-977, 2015.

28 Hall, M. M., and Bryden, H. L.: Direct estimates and mechanisms of ocean heat transport,”  
29 *Deep-Sea Res.*, **29**, No. 3A, 339–359, 1982.

1 Hallberg, R.: Using a Resolution Function to Regulate Parameterizations of Oceanic  
2 Mesoscale Eddy Effects. *Ocean Modelling*, 72, DOI:10.1016/j.ocemod.2013.08.007, 2013.

3 [Hallberg, R.: Numerical insabilities of the ice/ocean coupled system. \*CLIVAR Exchanges\*,](#)  
4 [65, 38-42, 2014.](#)

5 Hewitt, H. T., Copsey, D., Culverwell, I. D., Harris, C. M., Hill, R. S. R., Keen, A. B.,  
6 McLaren, A. J. and Hunke, E. C.: Design and implementation of the infrastructure of  
7 HadGEM3: the next-generation Met Office climate modelling system, *Geosci. Model Dev.*, 4,  
8 223-253, doi:10.5194/gmd-4-223-2011, 2011.

9 [Hirabara, M., Tsujino, H., Nakano, H. And Yamanaka, G.: Formation mechanisms of the](#)  
10 [Weddell Sea Polynya and the impact on the global abyssal ocean, \*J. Oceanography\*, 68 \(5\),](#)  
11 [doi:10.1007/s10872-012-0139-3, 2012.](#)

12 Hunke, E. C. and Lipscomb, W. H.: CICE: the Los Alamos sea ice model documentation and  
13 software users' manual, Version 4.1, LA-CC-06-012, Los Alamos National Laboratory, N.M.,  
14 2010.

15 Hunke, E. C., Lipscomb, W. H., Turner, A. K., Jeffery, N. and Elliott, S.: CICE: The Los  
16 Alamos Sea Ice Model, Documentation and Software User's Manual, Version 5.1. Tech. Rep.  
17 LA-CC-06-012, Los Alamos National Laboratory, Los Alamos, New Mexico. Available  
18 from: <http://oceans11.lanl.gov/trac/CICE>, 2015.

19 Hurlburt, H. E., Brassington, G. B., Drillet, Y., Kamachi, M., Benkiran, M., Bourdalle-Badie,  
20 R., Chassignet, E. P., Jacobs, G. A., Le Galloudec, O., Lellouche, J. M., Metzger, E. J.,  
21 Smedstad, O. M., and Wallcraft, A. J.: High-Resolution Global and Basin-Scale Ocean  
22 Analyses and Forecasts, *Oceanography*, 22(3), 110-127, 2009.

23 Ingleby, B. and Huddleston, M.: Quality control of ocean temperature and salinity profiles -  
24 Historical and real-time data. *J. Mar. Sys.*, 65, 158-175, 2007.

25 [Jones, D. C., Ito, T. and Lovenduski, N. S.: The transient response of the Southern Ocean](#)  
26 [pycnocline to changing winds, \*Geophys. Res. Lett.\*, 38, L15604, doi:10.1029/2011GL048145,](#)  
27 [2011.](#)

28 Jones P. W.: A User's Guide for SCRIP: A Spherical Remapping and Interpolation Package,  
29 Version 1.5, Los Alamos National Laboratory, 1998.

1 [Jochumsen, K., Quadfasel, D., Valdimarsson, H. and Jonsson, S.: Variability of the Denmark](#)  
2 [Strait overflow: Moored timeseries from 1996-2011, J. Geophys. Res., 117, C12003,](#)  
3 [doi:10.1029/2012JC008244, 2012.](#)

4 Johns, T. C., Durman, C. F., Banks, H. T., Roberts, M. J., McLaren, A. J., Ridley, J. K.,  
5 Senior, C. A., Williams, K. D., Jones, A., Rickard, G. J., Cusack, S., Ingram, W. J., Crucifix,  
6 M., Sexton, D. M. H., Joshi, M. M., Dong, B. W., Spencer, H., Hill, R. S. R., Gregory, J. M.,  
7 Keen, A. B., Pardaens, A. K., Lowe, J. A., Boda-Salcedo, A., Stark, S. and Searl, Y.: The new  
8 Hadley Centre climate model HadGEM1: Evaluation of coupled simulations in comparison to  
9 previous models, J. Climate, 19 (7), 1327–1353, 2006.

10 McClean, J. L., Bader, D. C., Bryan, F. O., Maltrud, M. E., Dennis, J. M., Mirin, A. A., Jones,  
11 P. W., Kim, Y. Y., Ivanova, D. P., Vertenstein, M., Boyle, J. S., Jacob, R. L., Norton, N.,  
12 Craig, A. and Worley, P. H.: A prototype two-decade fully-coupled fine-resolution CCSM  
13 simulation. Ocean Modelling, 39:10-30. 10.1016/j.ocemod.2011.02.011, 2011.

14 Macrander, A., Send, U., Valdimarsson, H., Jonsson, S. and Kase, R. H.: Interannual changes  
15 in the overflow from the Nordic Seas into the Atlantic Ocean through Denmark Strait.  
16 Geophys Res Lett 32(6):L06,606+, DOI 10.1029/2004gl021463, 2005.

17 Madec, G.: "NEMO ocean engine". Note du Pôle de modélisation, Institut Pierre-Simon  
18 Laplace (IPSL), France, No 27 ISSN No 1288-1619, 2014.

19 Marzocchi, A., Hirschi, J. J. M., Holliday, N. P., Cunningham, S. A., Blaker, A. T. and  
20 Coward, A. C.: The North Atlantic subpolar circulation in an eddy-resolving global ocean  
21 model. Journal of Marine Systems, 142, 126-143. 10.1016/j.jmarsys.2014.10.007, 2015.

22 Megann, A.P., Storkey, D., Aksenov, Y., Alderson, S., Calvert, D., Graham, T., Hyder, P.,  
23 Siddorn, J. and Sinha, B.: GO 5.0: The joint NERC-Met Office NEMO global ocean model  
24 for use in coupled and forced applications. Geosci. Model Dev., 7 (3). 1069-1092.  
25 10.5194/gmd-7-1069-2014, 2014.

26 [Meredith, M.P., Woodworth, P. L., Chereskin, T. K., Marshall, D. P., Allison, L. C., Bigg, G.](#)  
27 [R., Donohue, K., Heywood, K. J., Hughes, C. W., Hibbert, A., Hogg, A. McC., Johnson, H.](#)  
28 [L., Jullion, L., King, B. A., Leach, H., Lenn, Y.-D., Morales Maqueda, M. A., Munday, D. R.,](#)  
29 [Naveira Garabato, A. C., Provost, C., Sallee J.-B., and Sprintall, J.: Sustained monitoring of](#)  
30 [the Southern Ocean at Drake Passage: past achievements and future priorities, Reviews of](#)  
31 [Geophysics, 49, RG4005, doi:10.1029/2010RG000348, 2011.](#)

Formatted: No underline, Font color:  
Text 1

Formatted: No underline, Font color:  
Text 1



- 1 Minobe, S., Kuwano-Yoshida, A., Komori, N., Xie, S.-P. and Small, R. J.: Influence of the  
2 Gulf Stream on the troposphere, *Nature*, 452, doi:10.1038/nature06690, 2008.
- 3 Mizielinski, M. S., Roberts, M. J., Vidale, P. L., Schiemann, R., Demory, M.-E., Strachan, J.,  
4 Edwards, T., Stephens, A., Lawrence, B. N., Pritchard, M., Chiu, P., Iwi, A., Churchill, J., del  
5 Cano Novales, C., Kettleborough, J., Roseblade, W., Selwood, P., Foster, M., Glover, M., and  
6 Malcolm, A.: High-resolution global climate modelling: the UPSCALE project, a large-  
7 simulation campaign, *Geosci. Model Dev.*, 7, 1629-1640, doi:10.5194/gmd-7-1629-2014,  
8 2014.
- 9 Munday, D. R., Johnson, H. L. and Marshall, D. P.: Eddy saturation of equilibrated  
10 circumpolar currents, *J. Phys. Oceanogr.*, 43, 507-532, 2013.
- 11 Palmer, M. D., and McNeall, D. J.: Internal variability of Earth's energy budget as simulated  
12 by CMIP5 climate models, *Env. Res. Lett.*, 9 (3), 2014.
- 13 Pardaens A. K., Banks, H. T., Gregory, J. M. and Rowntree, P. R.: Freshwater transports in  
14 HadCM3, *Climate Dynamics*, 21, 177-195, 2003.
- 15 Pradal, M.-A., and Gnanadesikan, A.: How Does the Redi Parameter for Mesoscale Mixing  
16 Impact Global Climate in an Earth System Model? *Journal of Advances in Modeling the*  
17 *Earth System*, 6:586-601, 2014.
- 18 Rae, J. G. L., Hewitt, H. T., Keen, A. B., Ridley, J. K., West, A. E., Harris, C. M., Hunke, E.  
19 C. and Walters, D. N.: Development of Global Sea Ice 6.0 CICE configuration for the Met  
20 Office Global Coupled Model, *Geosci. Model Dev.*, 8, 2221-2230, doi:10.5194/gmd-8-2221-  
21 2015, 2015.
- 22 Sanchez-Gomez, E., Cassou, C., Ruprich-Robert, Y., Fernandez, E., and Teray, L.: Drift  
23 dynamics in a coupled model initialized for decadal forecasts, doi :10.1007/s00382-015-2678-  
24 y, *Clim. Dyn.*, 46, 1819–1840, 2016.
- 25 Sheldon, L., and Czaja, A.: Seasonal and interannual variability of an index of deep  
26 atmospheric convection over western boundary currents. *Q J R Meteorol Soc* 140: 22–30. doi:  
27 10.1002/qj.2103, 2014.
- 28 Small, R. J., Bacmeister, J., Bailey, D. A., Baker, A., Bishop, S., Bryan, F. O., Caron, J.,

1 Dennis, J., Gent, P. R., Hsu, H.-M., Jochum, M., Lawrence, D. M., Munoz Acevedo, E.,  
2 diNezio, P., Scheitlin, T., Tomas, R., Tribbia, J., Tseng, Y. and Vertenstein, M.: A new  
3 synoptic-scale resolving global climate simulation using the Community Earth System Model.  
4 Journal of Advances in Modeling Earth Systems, 6, 1065-1094, DOI:  
5 10.1002/2014MS000363, 2014.

6 Tréguier, A.-M., Deshayes, J., Lique, C., Dussin, R. and Molines, J.-M.: Eddy contributions  
7 to the meridional transport of salt in the North Atlantic. Journal of Geophysical Research.  
8 Oceans, Wiley-Blackwell, 117, doi:10.1029/2012JC007927, 2012.

9 Valcke, S., Craig, T. and Coquart, L.: OASIS3-MCT User Guide, OASIS3-MCT 3.0,  
10 Technical Report, TR/CMGC/15/38, CERFACS/CNRS SUC URA No 1875, Toulouse,  
11 France, 2015.

12 Vellinga, M. and Wu, P.: Low-Latitude Freshwater Influence on Centennial Variability of the  
13 Atlantic Thermohaline Circulation. J. Climate, 17, 4498–4511, doi: 10.1175/3219.1, 2004.

14 Waters, J., Lea, D. J., Martin, M. J., Mirouze, I., Weaver, A. and While, J.: Implementing a  
15 variational data assimilation system in an operational 1/4 degree global ocean model. Q.J.R.  
16 Meteorol. Soc., 141: 333-349. doi: 10.1002/qj.2388, 2015,

Formatted: No underline, Font color:  
Text 1

17 Weaver, A. T., Tshimanga, J. and Piacentini, A. : Correlation operators based on an implicitly  
18 formulated diffusion equation solved with the Chebyshev iteration. Q.J.R. Meteorol. Soc.,  
19 142: 455–471. doi: 10.1002/qj.2664, 2016,

Formatted: No underline, Font color:  
Text 1

20 Williams, K. D., Harris, C. M., Bodas-Salcedo, A., Camp, J., Comer, R. E., Copsey, D.,  
21 Fereday, D., Graham, T., Hill, R., Hinton, T., Hyder, P., Ineson, S., Masato, G., Milton, S. F.,  
22 Roberts, M. J., Rowell, D. P., Sanchez, C., Shelly, A., Sinha, B., Walters, D. N., West, A.,  
23 Woollings, T. and Xavier, P. K.: The Met Office Global Coupled model 2.0 (GC2)  
24 configuration. Geosci. Model Dev., 8, 1509-1524, doi:10.5194/gmd-8-1509-2015, 2015.

Formatted: Font color: Text 1

25 Zhang Y. and Vallis, G. K.: Ocean Heat Uptake in Eddying and Non-Eddying Ocean  
26 Circulation Models in a Warming Climate, J. Phys. Oceanogr., 43 (10), 2211-2229,  
27 doi:10.1175/JPO-D-12-078.1, 2013.

28

1 Table 1. Coupled models used in this paper

| Model                       | Horizontal Resolution | Coupling frequency |
|-----------------------------|-----------------------|--------------------|
| GC2 (Williams et al., 2015) | N216-ORCA025          | 3-hourly           |
| GC2-N512                    | N512-ORCA025          | 3-hourly           |
| GC2.1 (this paper)          | N216-ORCA025          | 1-hourly           |
| GC2.1-N512O12               | N512-ORCA12           | 1-hourly           |

2

3

4 Table 2. Key metrics from years 11-20 of the experiments and observations. TOA  
 5 observations from CERES/EBAF for years 2000-2010. Global mean SST error (compared to  
 6 Reynolds OI). Overflows are calculated as southward flow across the Greenland-Iceland-  
 7 Scotland ridge below density of  $27.8 \text{ kg m}^{-3}$  and have standard deviation shown in brackets.

| Model             | Net TOA<br>( $\text{W/m}^2$ ) | Global<br>mean SST<br>error (K) | Maximum<br>overturning<br>at<br>30°S (Sv) | Maximum<br>overturning at<br>24°N (Sv) | Net transport<br>from overflows<br>(Sv) |
|-------------------|-------------------------------|---------------------------------|-------------------------------------------|----------------------------------------|-----------------------------------------|
| Observations      | 0.85                          |                                 |                                           |                                        |                                         |
| GC2               | 1.61                          | 0.25                            | 13.7                                      | 14.6                                   | 4.0 (0.24)                              |
| GC2-N512          | 1.79                          | 0.60                            | 14.3                                      | 14.9                                   | 3.9 (0.28)                              |
| GC2.1             | 1.64                          | 0.29                            | 14.3                                      | 16.4                                   | 4.7 (0.26)                              |
| GC2.1-<br>N512O12 | 2.02                          | 0.44                            | 17.5                                      | 17.7                                   | 5.9 (0.42)                              |

8

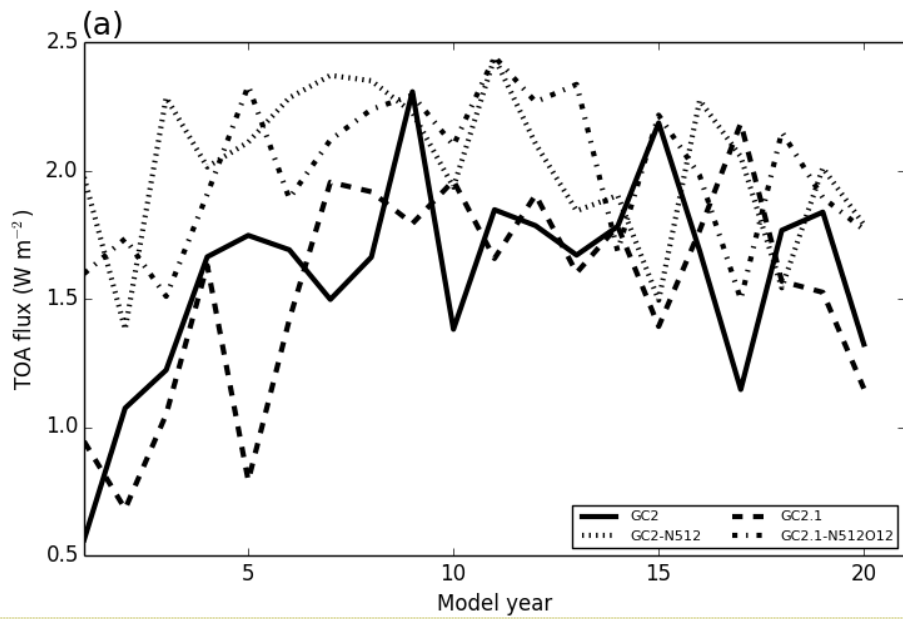

Formatted: No underline, Font color: Black

1

2

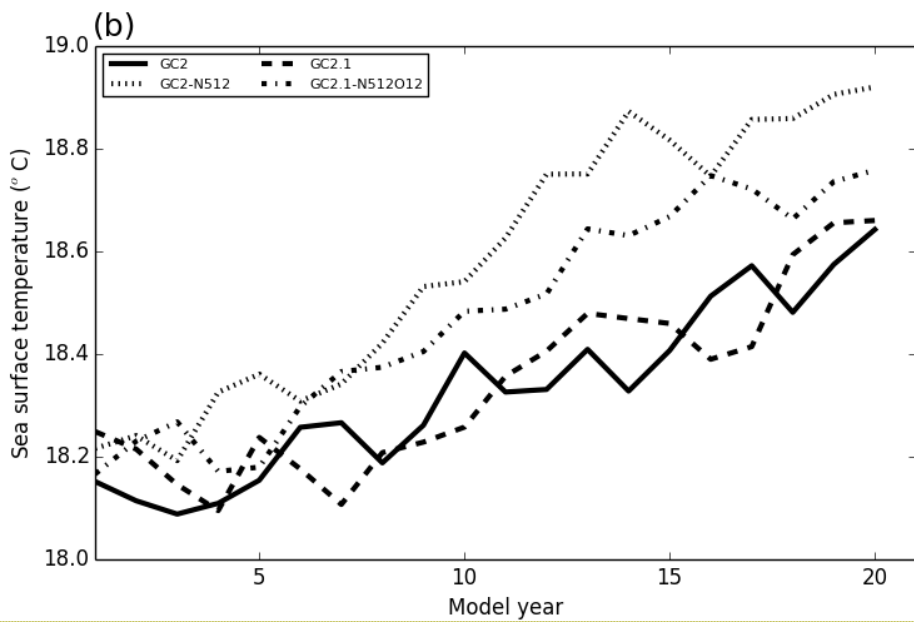

Formatted: No underline, Font color: Black

3

4

5

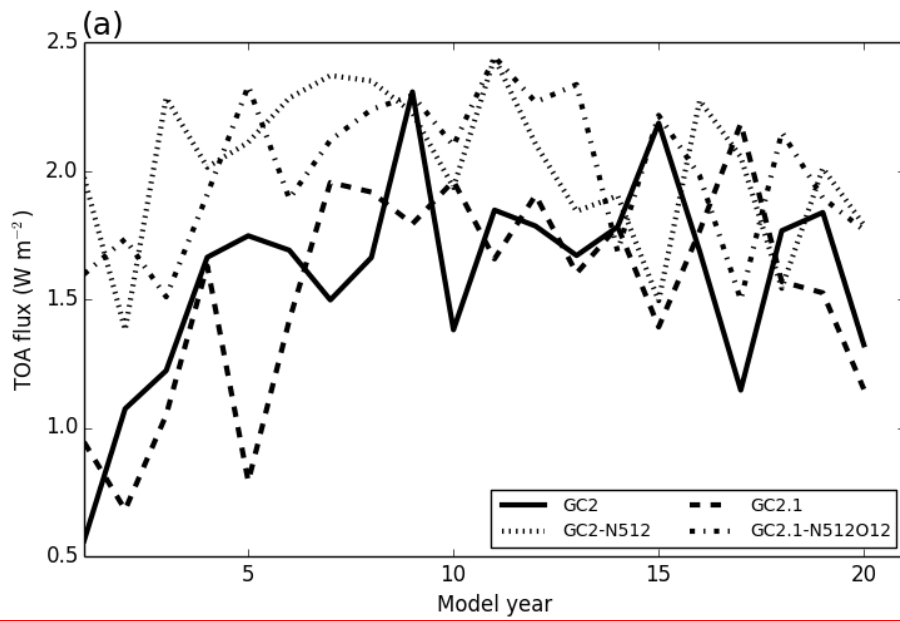

Formatted: No underline, Font color: Black

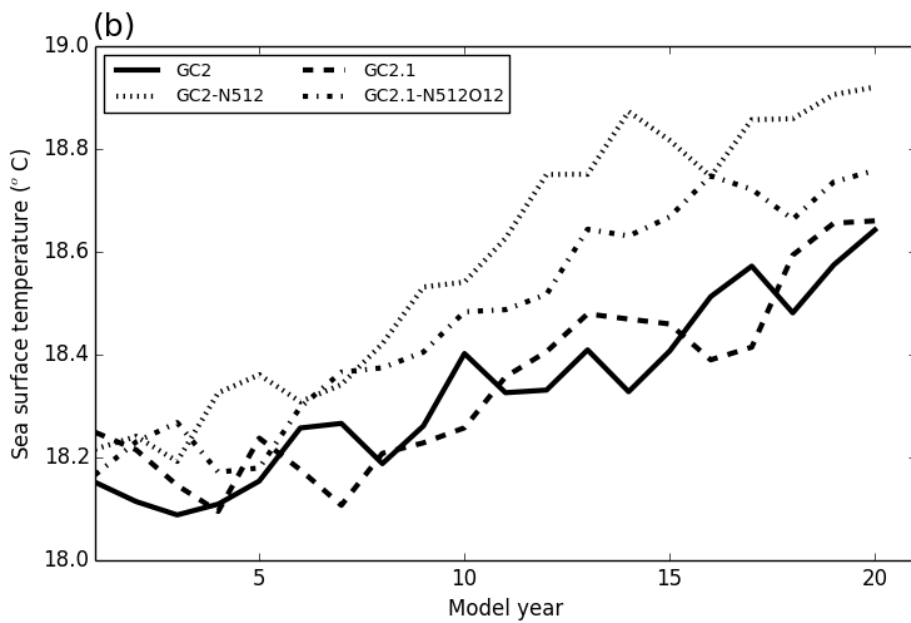

Formatted: No underline, Font color: Black

Figure 1: Timeseries of a) net TOA and b) global mean SST from GC2, GC2-N512, GC2.1 and GC2.1-N512O12.

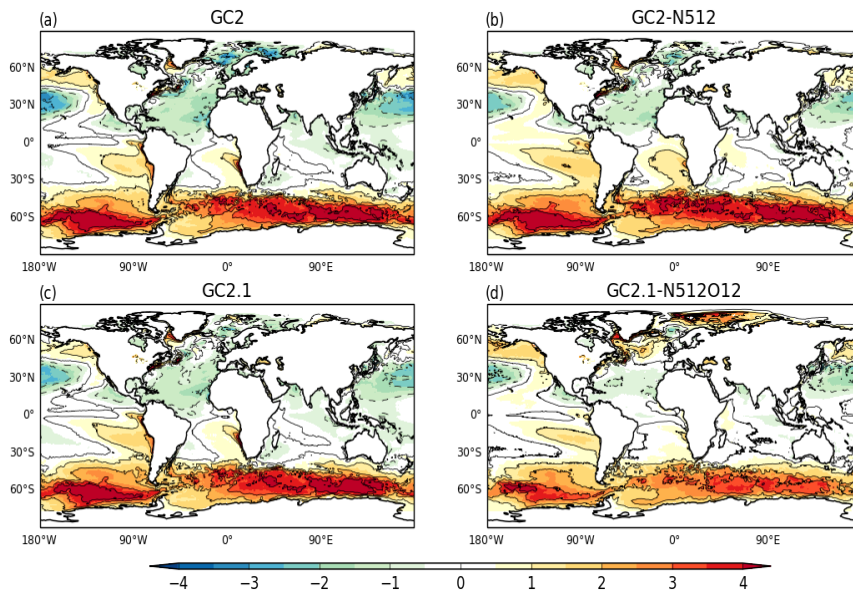

**Formatted:** No underline, Font color: Auto

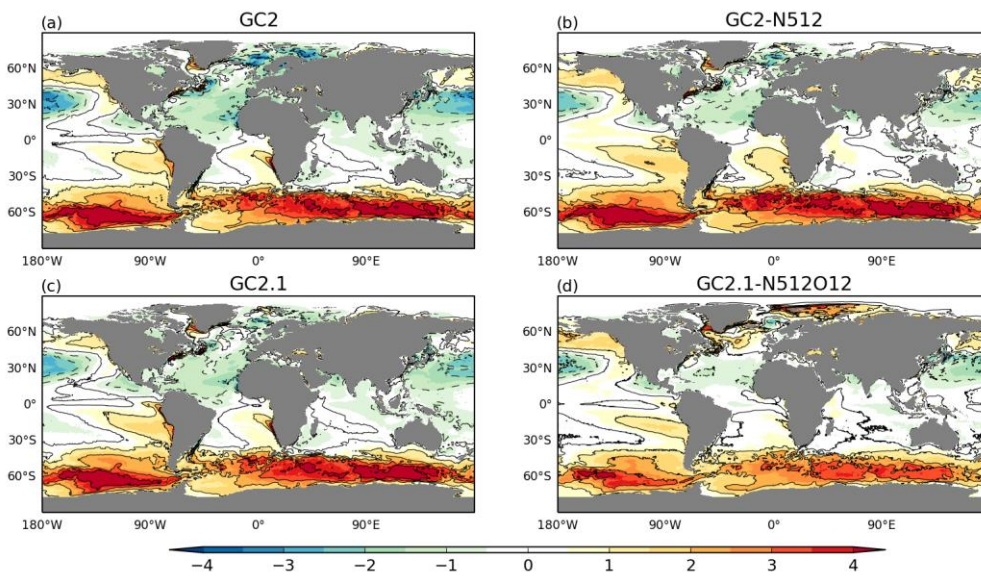

**Formatted:** No underline, Font color: Black

1

2

3 Figure 2: Differences between modelled SST from years 11-20 and observed SST from  
 4 HadISST (°C) for a) GC2, b) GC2-N512, c) GC2.1 and d) GC2.1-N512O12.

5

6

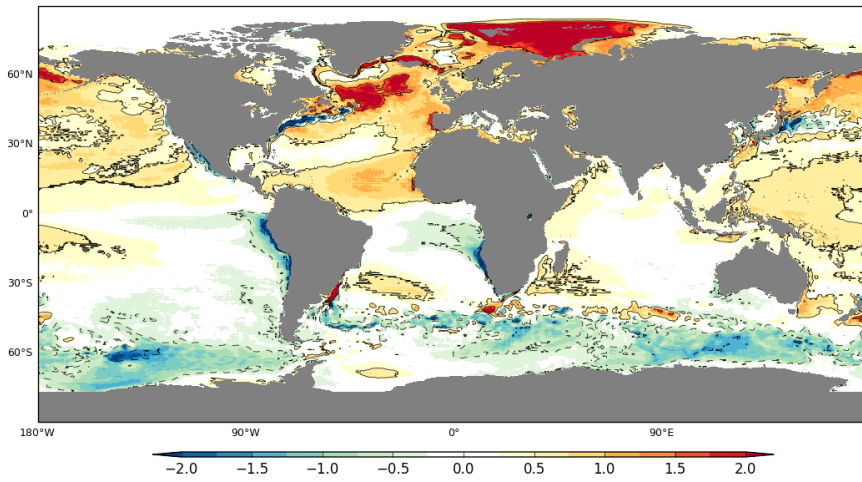

**Formatted:** No underline, Font color: Black

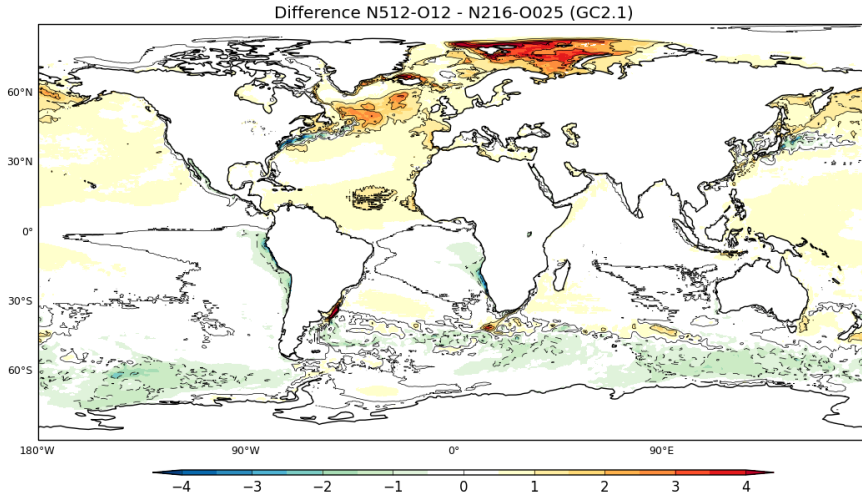

1

2

3

4

Figure 3: SST difference (°C) for years 11-20 between GC2.1-N512O12 and GC2.1

1

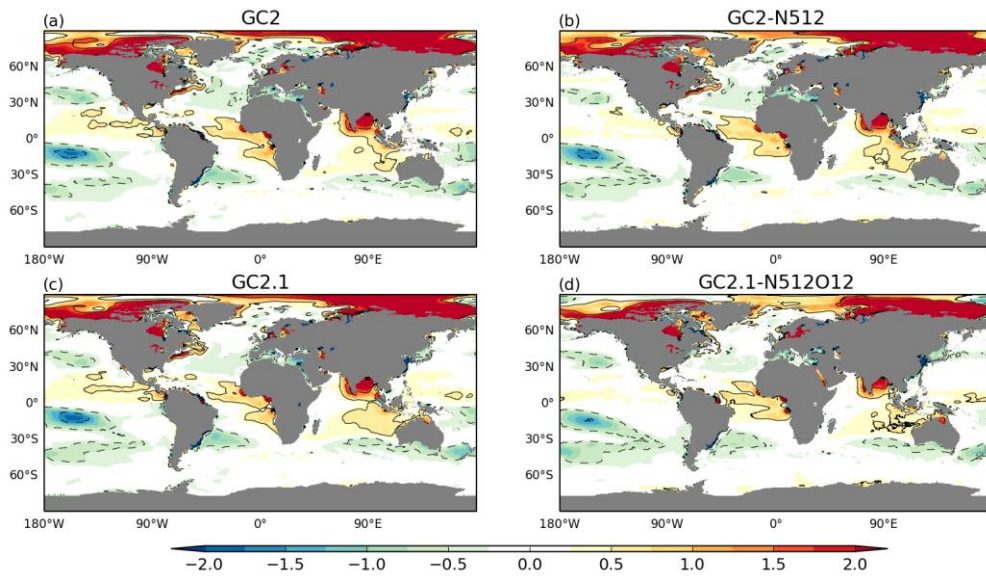

Formatted: No underline, Font color: Black

2

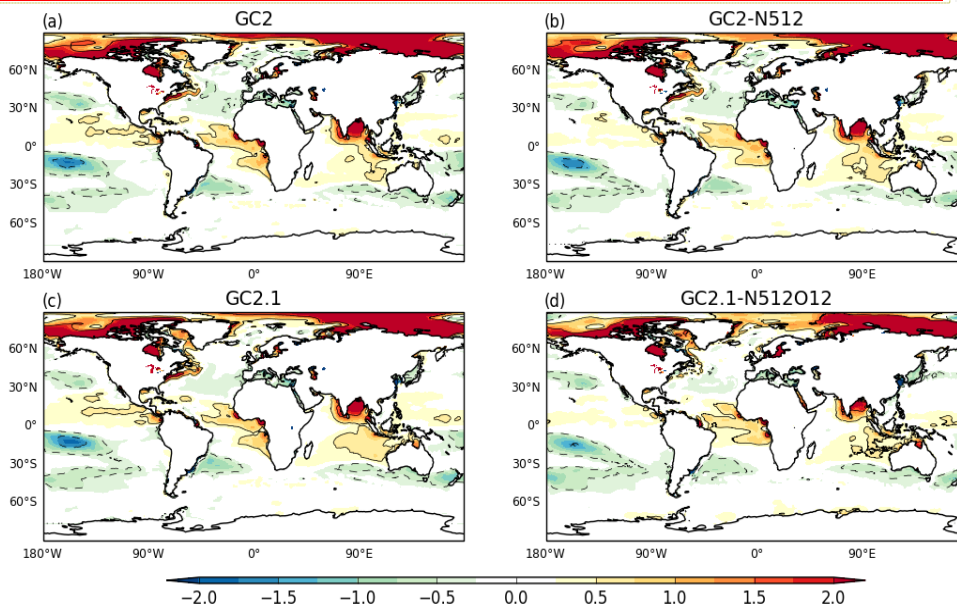

3

4

5 Figure 4: Differences between modelled SSS from years 11-20 and observed SSS from EN4  
6 (psu) for a) GC2, b) GC2-N512, c) GC2.1 and d) GC2.1-N512O12.

7





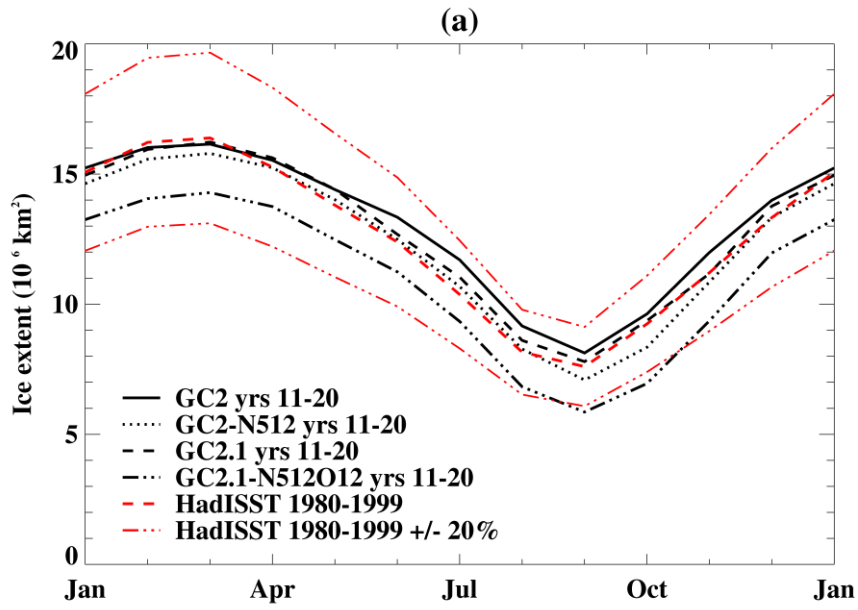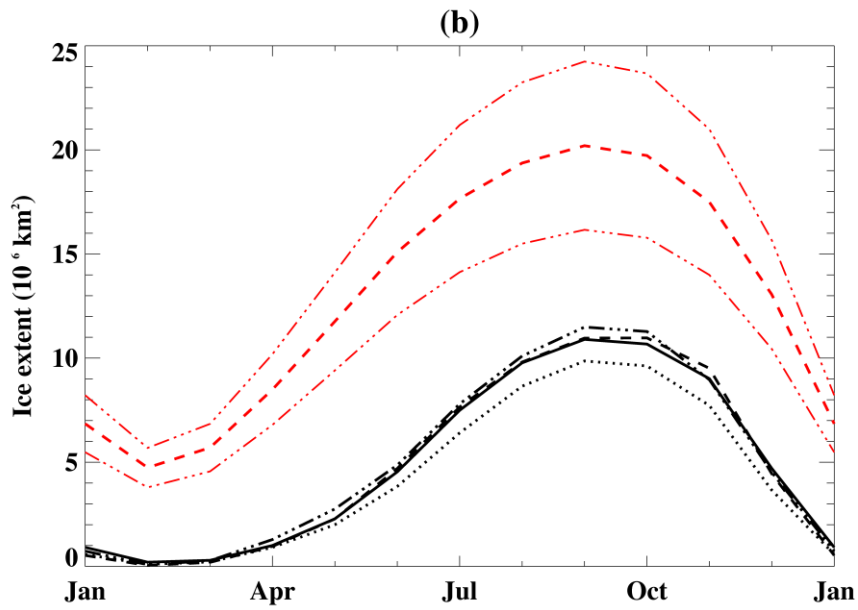

Formatted: No underline, Font color: Black

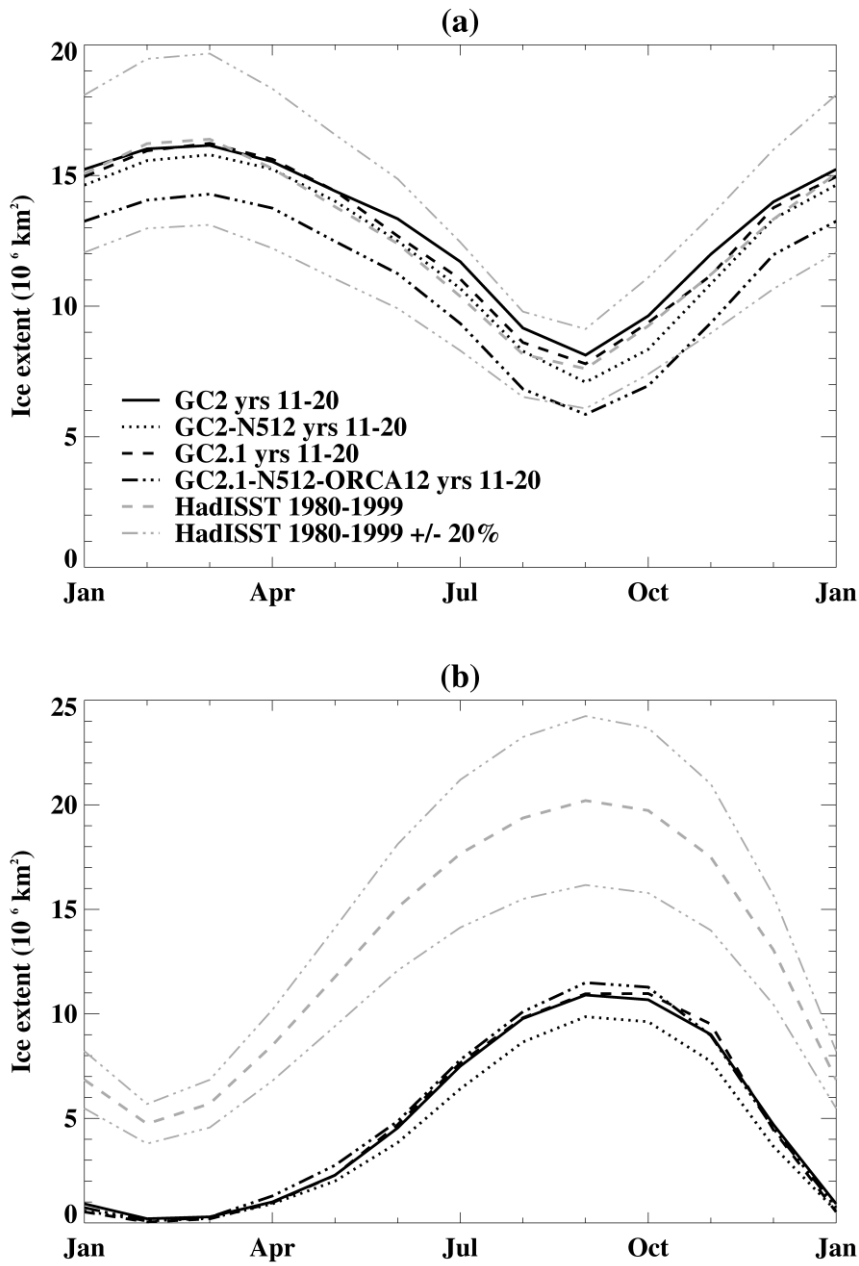

1  
2  
3 Figure 5: Seasonal cycle of sea ice extent in a) Northern and b) Southern hemisphere for years  
4 11-20 compared against HadISST 1980-99 and with +/- 20% error bars denoted.  
5



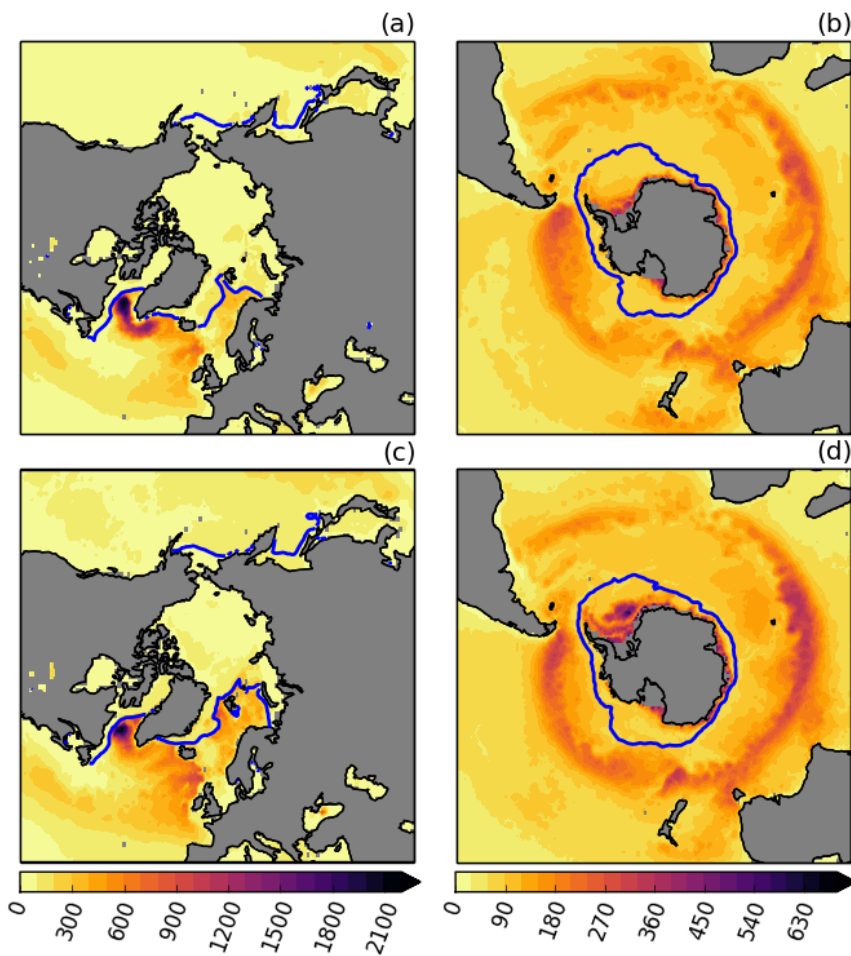

Formatted: No underline, Font color: Black

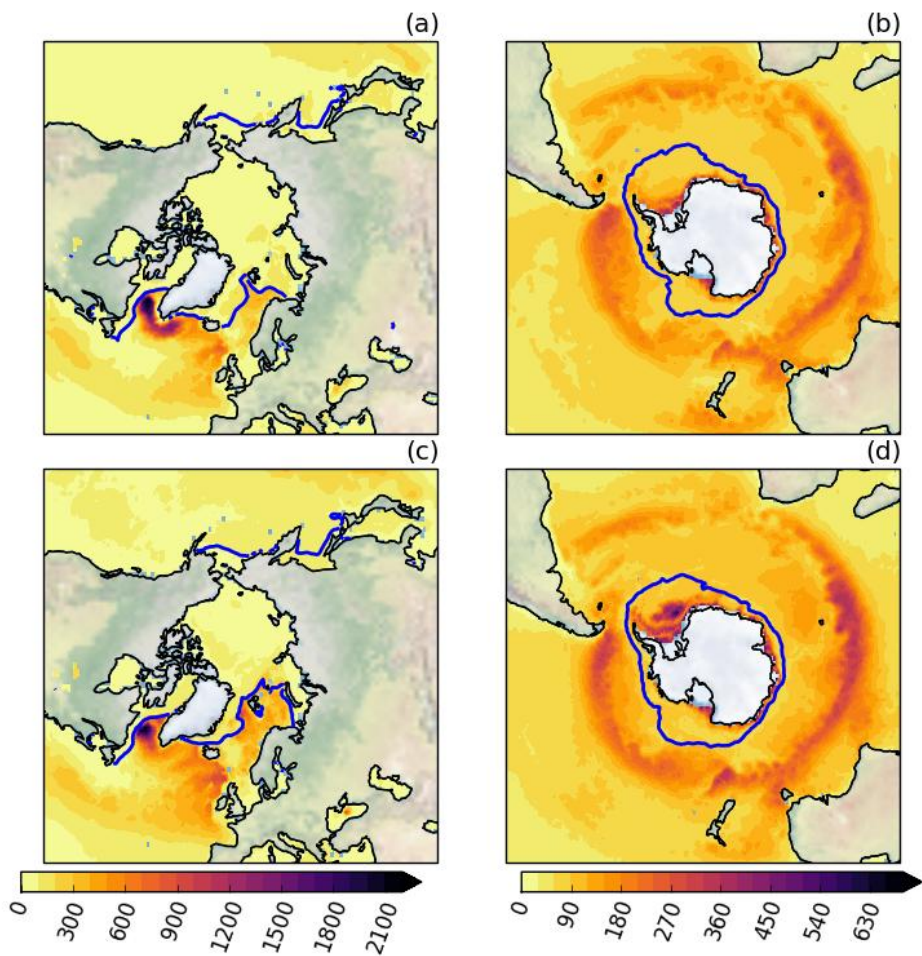

1  
2  
3  
4  
5  
6  
7  
8

Figure 6: Mean March Northern hemisphere winter mixed layer depth (m) and Arctic sea ice edge and mean September Southern hemisphere winter mixed layer depth (m) and sea ice edge for years 11-20 for GC2 (a,b) and GC2.1-N512O12 (c,d). The sea ice edge (marked in blue) is based on a threshold of 15% ice concentration.

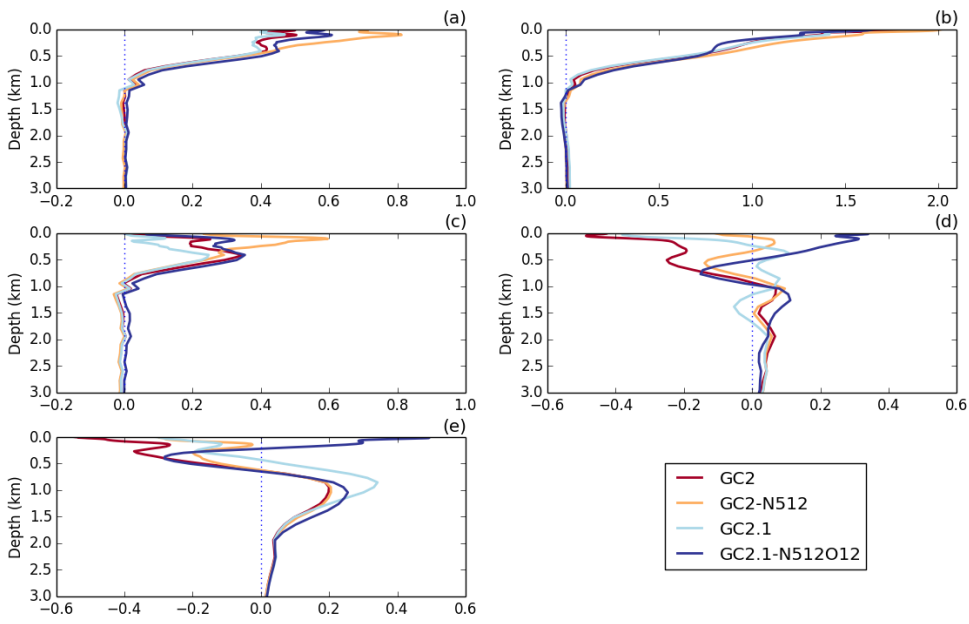

**Formatted:** No underline, Font color: Black

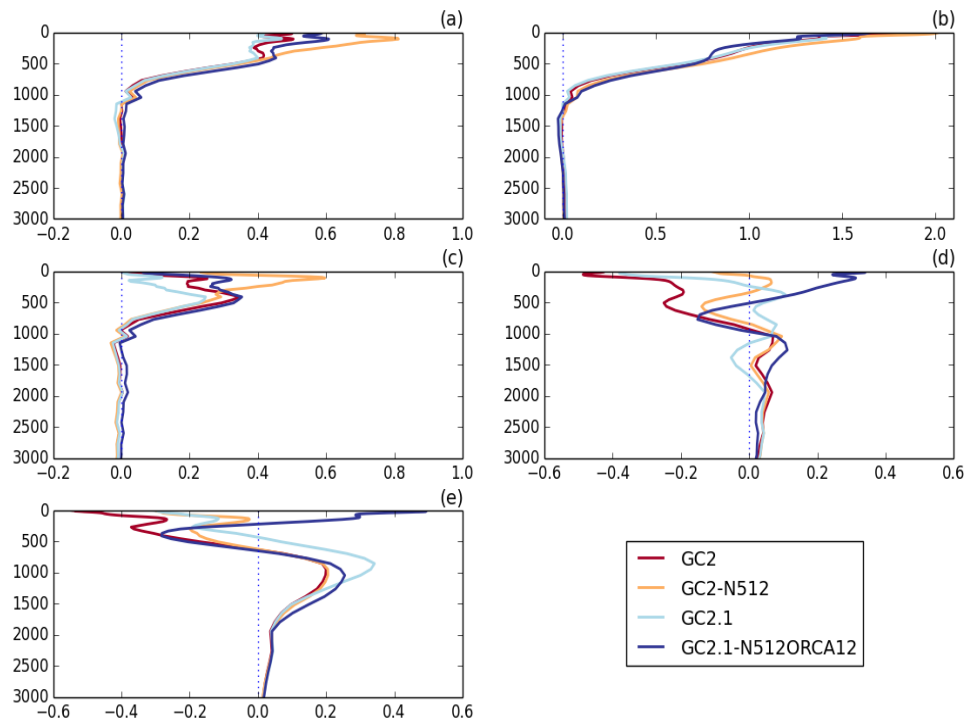

1  
2  
3  
4  
5  
6  
7  
8

Figure 17: Area-weighted mean temperature difference (years 11-20 minus year 1; °C) for GC2, GC2-N512, GC2.1 and GC2.1-N512ORCA12 for a) global, b) 90S-30S, c) 30S-30N, d) 30N-90N, e) 65N-90N. Note the range on the x-axis is equal in all panels except (b). The vertical axis denotes depth (m).



Formatted: No underline, Font color: Black

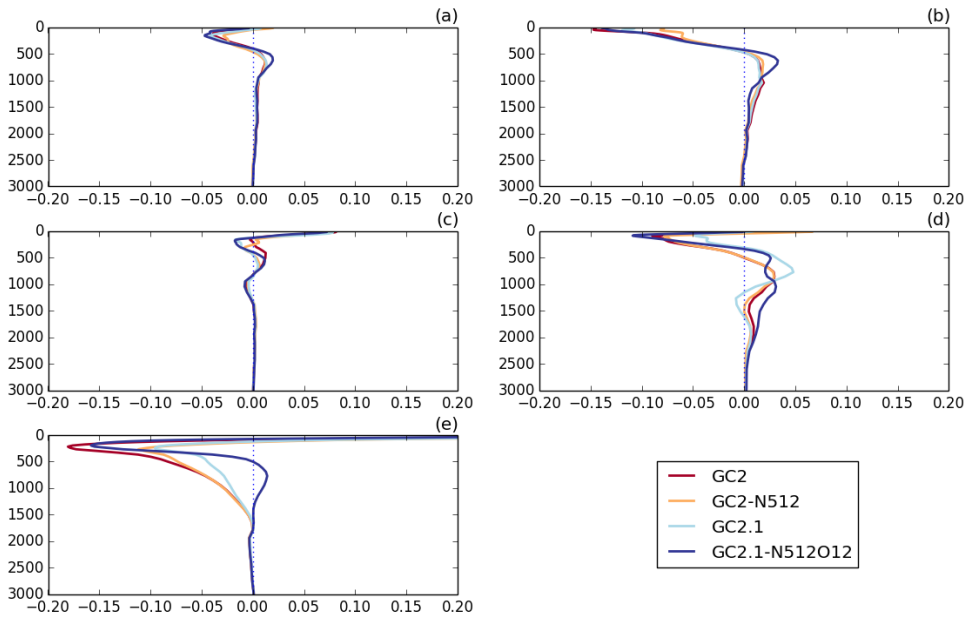

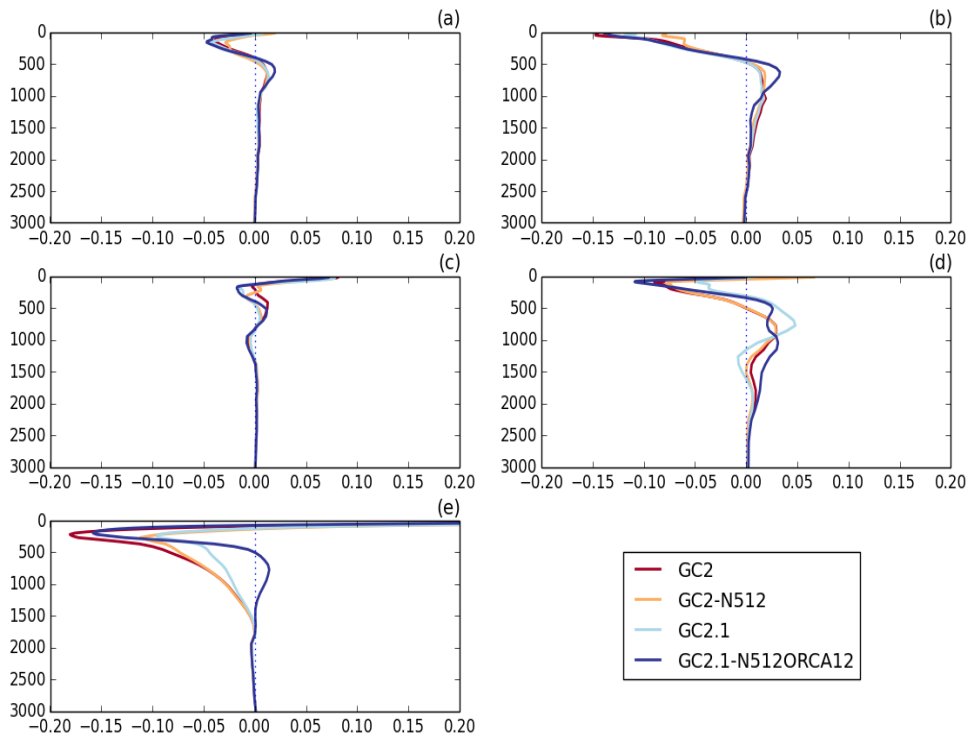

1 .  
 2 Figure 88: Area-weighted mean salinity difference (years 11-20 minus year 1; psu) for GC2,  
 3 GC2-N512, GC2.1 and GC2.1-N512O12 for a) global, b) 90S-30S, c) 30S-30N, d) 30N-90N,  
 4 e) 65N-90N. The vertical axis denotes depth (m).

5  
 6

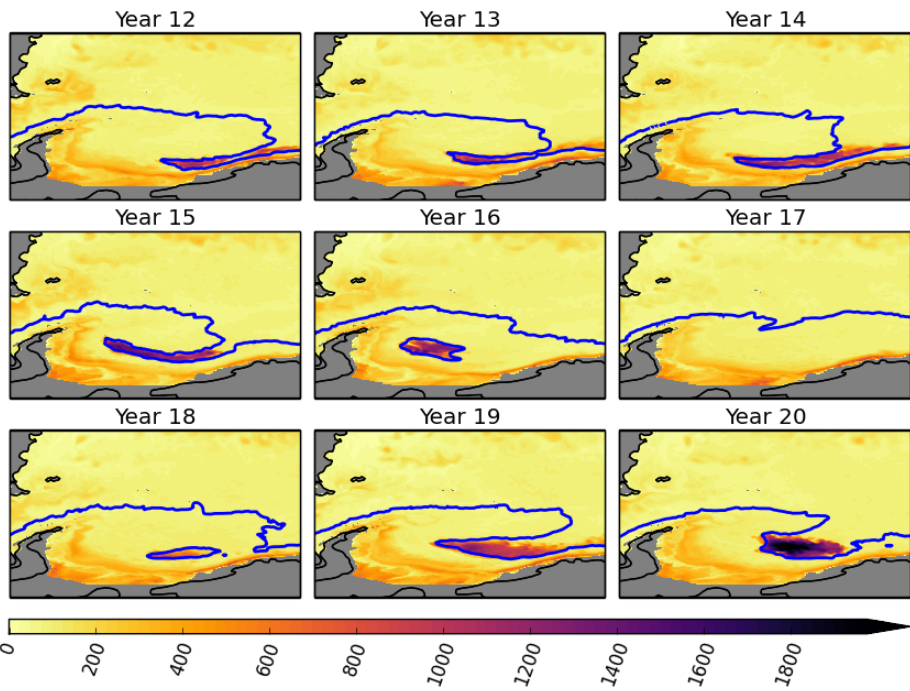

Formatted: No underline, Font color: Black

1  
2  
3  
4  
5  
6  
7

Figure 9: September mixed layer depth (m) and sea ice edge in GC2.1-N512O12 for years 12-20 indicating the presence of a Weddell Sea polynya. The sea ice edge (marked in blue) is based on a threshold of 15% ice concentration.

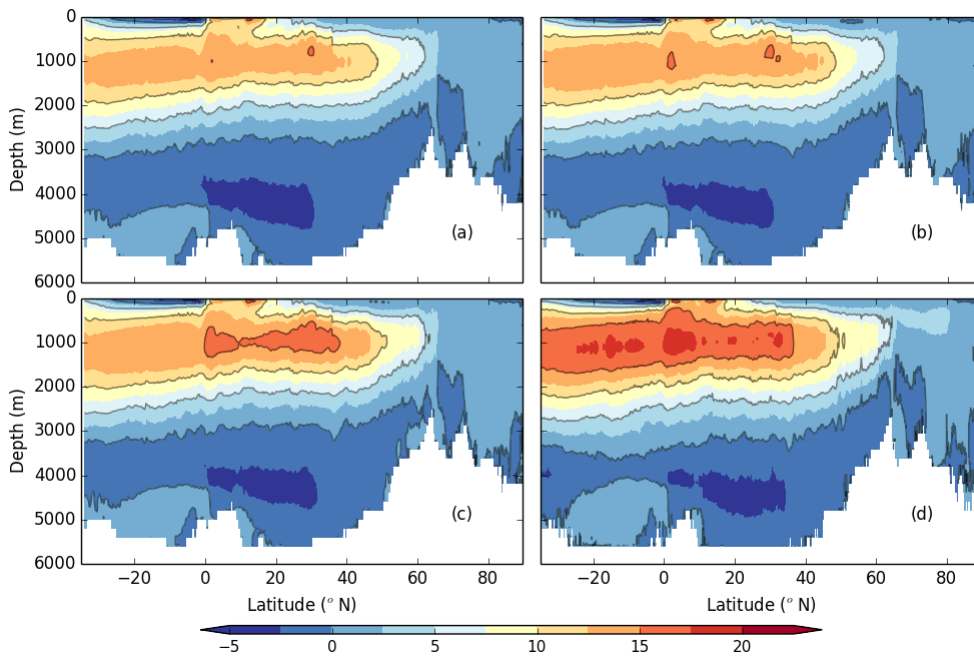

1  
2  
3 | Figure 109: Atlantic Meridional overturning for (a) GC2, (b) GC2-N512, (c) GC2.1 and (d)  
4 | GC2.1-N512O12, meaned over years 11-20. Contours in Sverdrups ( $10^6 \text{ m}^3\text{s}^{-1}$ ), with line  
5 | contour spacing of 5 Sv.

6 |  
7 |  
8 |  
9 |



Formatted: No underline, Font color: Black

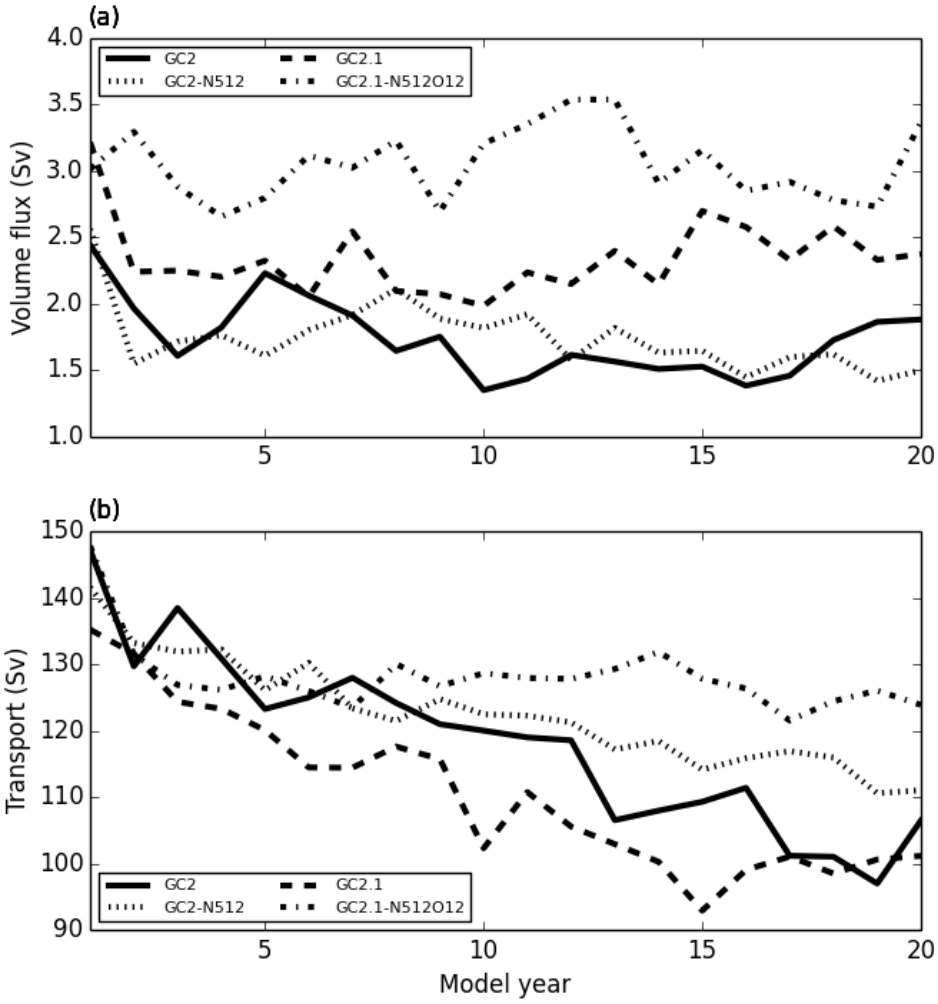

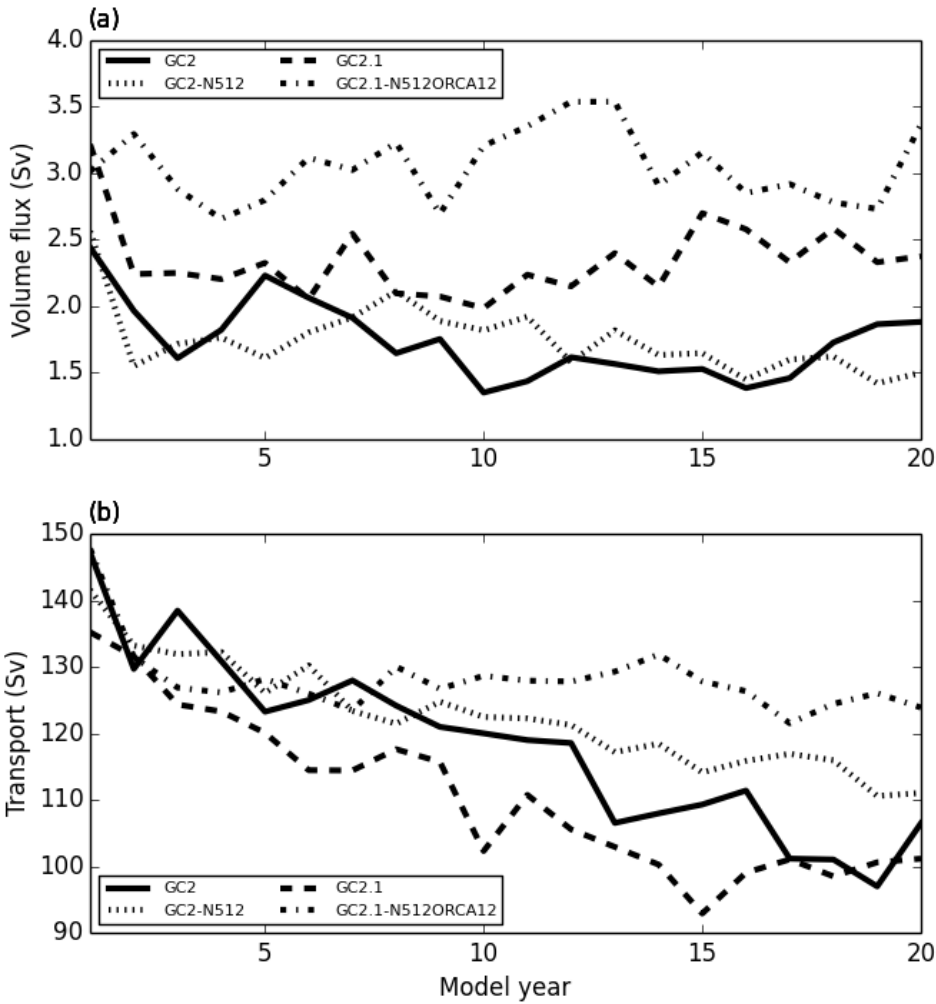

1  
2  
3 Figure 119: a) Denmark Straits volume flux (Sv) (calculated as southward flow across the  
4 Greenland-Iceland-Scotland ridge below density of  $27.8 \text{ kg m}^{-3}$ ) and b) Antarctic Circumpolar  
5 Current transport (Sv) from GC2, GC2-N512, GC2.1 and GC2.1-N512ORCA12

**Formatted:** No underline, Font color: Black

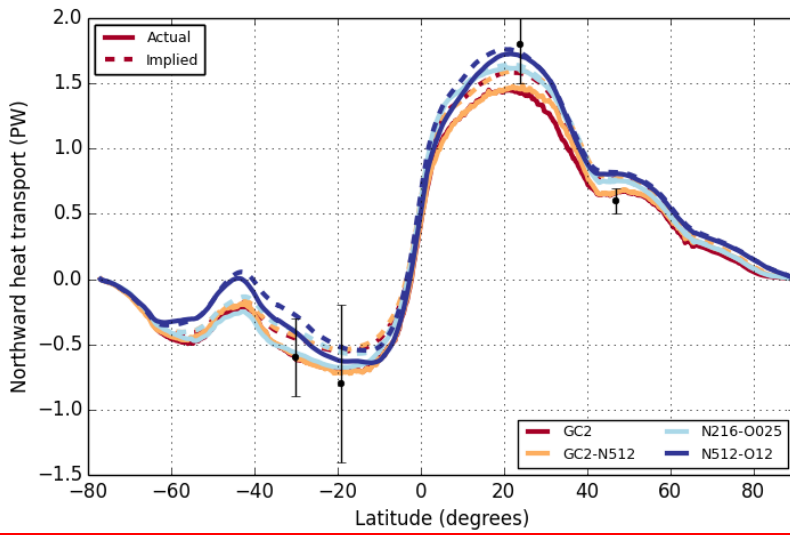

1

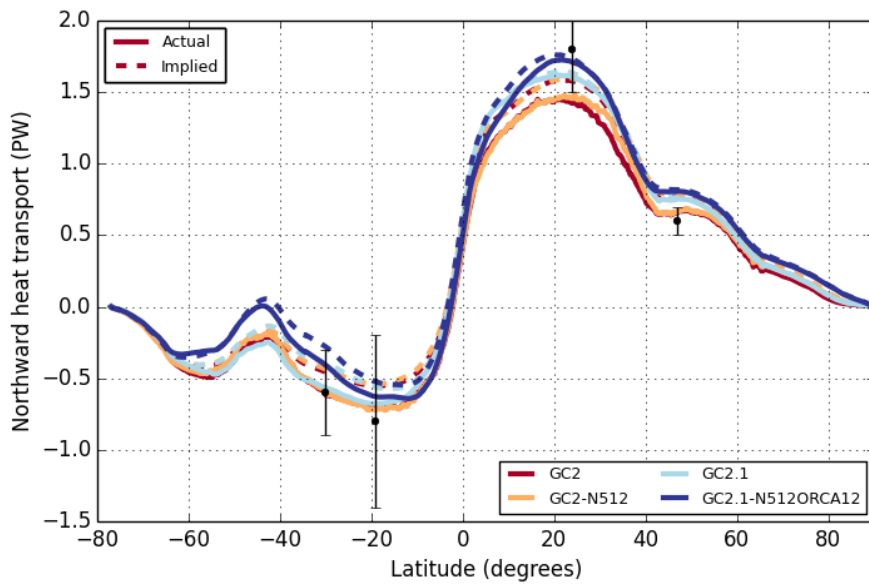

2



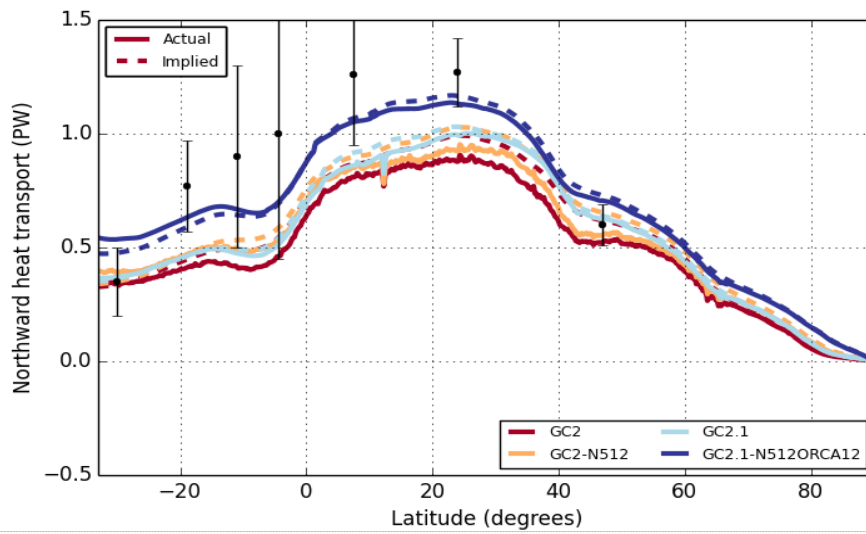

Formatted: No underline, Font color: Black

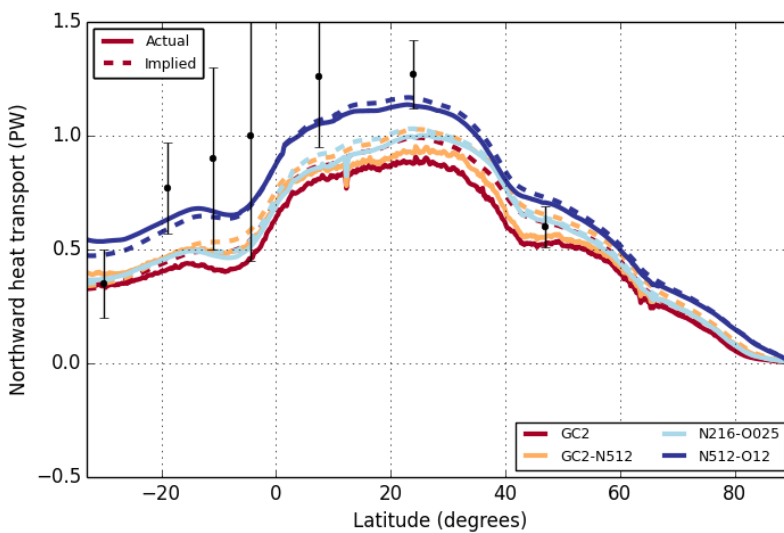

Formatted: No underline, Font color: Black

1

2

3 Figure 124: Actual (bold) and implied (dashed) northward heat transports from GC2, GC2-  
 4 N512, GC2.1 and GC2.1-N512O12 for (a) global and (b) Atlantic basins. The implied  
 5 transport (integrated southwards from the **North Pole** using the ocean surface heat flux)  
 6 uses heat fluxes in which the global mean imbalance has been removed at every point.  
 7 Observational estimates and associated error bars from Ganachaud and Wunsch (2003) are  
 8 shown.
